# Supplementary material for: Area deprivation, screen time and consumption of food and drink high in fat salt and sugar (HFSS) in young people: results from a cross-sectional study in the UK
Source: PubMed Central journal article supplement (PMC6609085; doi:10.1136/bmjopen-2018-027333), 2019-06-28
Supplement: bmjopen-2018-027333.draft_revisions.pdf [file bmjopen-2018-027333.draft_revisions.pdf]

# BMJ Open

BMJ Open is committed to open peer review. As part of this commitment we make the peer review history of every article we publish publicly available.

When an article is published we post the peer reviewers' comments and the authors' responses online. We also post the versions of the paper that were used during peer review. These are the versions that the peer review comments apply to.

The versions of the paper that follow are the versions that were submitted during the peer review process. They are not the versions of record or the final published versions. They should not be cited or distributed as the published version of this manuscript.

BMJ Open is an open access journal and the full, final, typeset and author-corrected version of record of the manuscript is available on our site with no access controls, subscription charges or pay-per-view fees (<http://bmjopen.bmj.com>).

If you have any questions on BMJ Open's open peer review process please email [info.bmjopen@bmj.com](mailto:info.bmjopen@bmj.com)

# BMJ Open

## Health Inequalities, Junk Food Marketing and Obesity in Young People: Results of a Cross-Sectional Study

|                               |                                                                                                                                                                                                                                                                                                                                                                                                                                                                                           |
|-------------------------------|-------------------------------------------------------------------------------------------------------------------------------------------------------------------------------------------------------------------------------------------------------------------------------------------------------------------------------------------------------------------------------------------------------------------------------------------------------------------------------------------|
| Journal:                      | <i>BMJ Open</i>                                                                                                                                                                                                                                                                                                                                                                                                                                                                           |
| Manuscript ID                 | bmjopen-2018-027333                                                                                                                                                                                                                                                                                                                                                                                                                                                                       |
| Article Type:                 | Research                                                                                                                                                                                                                                                                                                                                                                                                                                                                                  |
| Date Submitted by the Author: | 17-Oct-2018                                                                                                                                                                                                                                                                                                                                                                                                                                                                               |
| Complete List of Authors:     | Thomas, Fiona; Cancer Research UK, Cancer Prevention<br>Thomas, Christopher; Cancer Research UK, Policy Research Centre for Cancer Prevention<br>Hooper, Lucie; Cancer Research UK, Policy Research Centre for Cancer Prevention<br>Rosenberg, Gillian; Cancer Research UK, Policy Research Centre for Cancer Prevention<br>Vohra, Jyotsna; Cancer Research UK, Cancer Prevention<br>Bauld, Linda; University of Edinburgh, Usher Institute of Population Health Sciences and Informatics |
| Keywords:                     | young people, inequalities, consumption, screen time, health knowledge, deprivation                                                                                                                                                                                                                                                                                                                                                                                                       |
|                               |                                                                                                                                                                                                                                                                                                                                                                                                                                                                                           |

SCHOLARONE™  
Manuscripts

## Health Inequalities, Junk Food Marketing and Obesity in Young People: Results of a Cross-Sectional Study

Fiona Thomas<sup>1</sup>, Christopher Thomas<sup>1</sup>, Lucie Hooper<sup>1</sup>, Gillian Rosenberg<sup>1</sup>, Jyotsna Vohra<sup>1</sup> and Linda Bauld<sup>1,2</sup>

<sup>1</sup>Cancer Policy Research Centre, Cancer Research UK

<sup>2</sup>Usher Institute, University of Edinburgh

**Key words:** Obesity, Young people, Inequalities, Consumption, Screen time, Health Knowledge, Deprivation

**Correspondence to:** Fiona Thomas, Cancer Research UK, Angel Building, 407 St. John Street London, EC1V 4AD

### Contact Details:

Fiona Thomas – [fiona.thomas@hotmail.com](mailto:fiona.thomas@hotmail.com)

Christopher Thomas – [Christopher.Thomas@cancer.org.uk](mailto:Christopher.Thomas@cancer.org.uk)

Lucie Hooper – [Lucie.Hooper@cancer.org.uk](mailto:Lucie.Hooper@cancer.org.uk)

Gillian Rosenberg – [Gillian.Rosenberg@cancer.org.uk](mailto:Gillian.Rosenberg@cancer.org.uk)

Jyotsna Vohra – [Jyotsna.Vohra@cancer.org.uk](mailto:Jyotsna.Vohra@cancer.org.uk)

Linda Bauld – [Linda.Bauld@ed.ac.uk](mailto:Linda.Bauld@ed.ac.uk)

**Word Count:** 2832

**Number of Tables:** 4

**Number of References:** 49

### Corresponding Author:

Fiona Thomas

Cancer Policy Research Centre

Cancer Research UK

Angel Building

407 St. John Street

London

EC1V 4AD

United Kingdom

Tel - 020 3469 6357

1  
2  
3 Email - [fiona.thomas@hotmail.com](mailto:fiona.thomas@hotmail.com)  
4  
5  
6  
7  
8  
9  
10  
11  
12  
13  
14  
15  
16  
17  
18  
19  
20  
21  
22  
23  
24  
25  
26  
27  
28  
29  
30  
31  
32  
33  
34  
35  
36  
37  
38  
39  
40  
41  
42  
43  
44  
45  
46  
47  
48  
49  
50  
51  
52  
53  
54  
55  
56  
57  
58  
59  
60

For peer review only

## Abstract

**Objectives:** To investigate associations between deprivation in young people and consumption of foods high in fat, salt and sugar (HFSS), screen time exposure and health knowledge.

**Design:** An online cross-sectional survey with 11-19-year olds in the UK, where participants reported consumption behaviours across 13 HFSS and two non-HFSS groups; screen time for commercial television and streaming services; and knowledge of health conditions and their links to obesity.

**Setting:** United Kingdom

**Participants:** 3,348 young people aged 11-19 across the United Kingdom (UK).

**Main outcome measures:** The study assessed the consumption behaviours, commercial screen time exposure and the health knowledge of 3,348 11-19-year olds. Multivariate binary regression analysis, controlling for age and gender, was performed.

**Results:** Deprivation level was associated with increases in consumption of six of the HFSS products including energy drinks (OR:2.943 /  $P < 0.001$ ) and sugary drinks (OR:1.938,  $P < 0.001$ ), and a reduction in consumption in the two non-HFSS products included in the study; fruit (OR:0.668 /  $P = 0.004$ ) and vegetables (OR:0.306 /  $P < 0.001$ ). Deprivation was associated with high weekly screen time of both television (OR:2.477 /  $P < 0.001$ ) and streaming (OR:1.679 /  $P = 0.001$ ). Health knowledge was also associated with deprivation. There was lower awareness of the association of obesity and cancer (OR:0.697 /  $P = 0.003$ ) type 2 diabetes (OR:0.64 /  $P = 0.004$ ) and heart disease (OR:0.519 /  $P < 0.001$ ) in the most deprived.

**Conclusions:** Young people from the more deprived areas of the UK were more likely to consume of a range of HFSS products, report increased exposure to HFSS advertising and have a poorer awareness of health conditions associated with overweight and obesity. The findings suggest that population level measures addressing childhood obesity should account for consumption patterns among different groups of children and young people and the factors that may influence these.

### Strengths and limitations of this study

- The study identified an association between socio-economic deprivation and risk factors that may influence the prevalence of childhood obesity in the UK through a nationally representative sample of young people aged 11-19 across England and each of the devolved nations.
- Data collected for this study was from a single cross-sectional survey, so it is not possible to determine causation between the variables.
- The study could not directly assess exposure to marketing of foods high in fat, salt and sugar (HFSS), although previous research that had explored the relationship between commercial screen time and exposure and found the two to be related, provided us with greater confidence that screen time may be a reliable proxy for marketing exposure under current UK marketing regulations.

**‘What this paper adds’ box**Section 1: What is already known on this topic?

- Obesity is a complex health condition with multiple drivers
- The most deprived groups are more likely to suffer from negative health outcomes, including those caused by higher rates of childhood obesity.
- An association between greater exposure to junk food marketing and obesity has been found in previous research.
- To date, associations between deprivation, HFSS marketing and obesity in young people have not been fully investigated.

Section 2: What this study adds

- Young people living in more deprived areas reported higher levels of weekly screen time exposure from both television and streaming services.
- The most deprived young people were more likely to consume six of thirteen food and drink categories that are high in fat, salt and sugar (HFSS) and were less likely to consume foods in the two non-HFSS categories included in the study.
- There was lower awareness of the association between obesity and relevant health conditions such as heart disease, cancer and type 2 diabetes among the most deprived respondents.
- Future policies and interventions to address childhood obesity should take into account how these might affect young people living in more deprived communities

## BACKGROUND

In the UK, around 30% of children are overweight or obese<sup>1</sup> the highest rate of childhood obesity in Europe. This overall figure masks considerable disparities by socioeconomic status. Overweight and obesity prevalence for children in the 10% most deprived areas in England, for example, is more than double that of those who live in the least deprived 10%<sup>2</sup>. Longer term, an obese child is around five times more likely to become an obese adult<sup>3</sup>, and there is substantial evidence that obesity in adulthood directly contributes to the development of conditions such as diabetes, coronary heart disease, stroke and 13 different types of cancer<sup>4-8</sup>.

Previous studies have provided diverse explanations for the rise in levels of obesity, ranging from genetics, increased calorie intake, an increase in sedentary behaviour or a combination of factors<sup>9-11</sup>. The calorie intake increase is thought to be the most significant influence accounting for this rise, caused by a range of environmental factors<sup>9,12,13</sup>, including the role of the marketing and promotion of foods that are high in fat, salt and sugar (HFSS). Marketing of these foods is extensive and delivered through a variety of platforms including television, streaming, price promotions and print media. Studies have identified a substantial expenditure by manufacturers and retailers on the marketing of junk food to children and young adults<sup>14,15</sup>, and identified that industry recognises the potential marketing has for influencing consumption choices<sup>16</sup>. The link between marketing and weight outcomes, as well as increased consumption of HFSS products has been highlighted by a number of previous studies<sup>17-23</sup>. Assessing exposure to HFSS marketing via self-reported recall of viewing advertisements does have limitations. Thus some studies have used commercial screen time as a proxy for TV and online marketing exposure<sup>17,21</sup>, whereby greater screen time indicates increased exposure to HFSS advertising. Prior content analysis of UK television, where young people make up a large proportion of the audience, highlighted the increased likelihood of HFSS marketing exposure<sup>24</sup>, supporting this proxy measure.

Increasingly, there is a need to identify how marketing and promotion affect children in different social groups or those living in more, or less deprived communities. Studies have previously identified an association between socioeconomic status and obesity<sup>25,26</sup>. Highlighting such associations between socioeconomic status and contributing factors to obesity, such as exposure to HFSS advertising, are important in identifying interventions or policy actions that can contribute to addressing the public health problem. Halting or reversing current obesity trends is a current priority for public health policies in the UK<sup>27,28</sup>, and globally<sup>29,30</sup>.

Hooper et al<sup>31</sup>, identified that there is a low level of public awareness of the link between overweight and obesity and resulting preventable health conditions, including cancer. Only 25% of the UK adult population are aware of this link and this lack of awareness is more prevalent in less affluent groups. Other studies have also found an association between greater health awareness and increased support for policy change, particularly for alcohol policy<sup>32,33</sup>. Greater health knowledge may therefore affect how young people view the acceptability of HFSS marketing and also consumption choices.

To date, there is limited research on the association between deprivation, HFSS marketing and obesity. Given these gaps, this study aims to investigate whether such a relationship exists and how it might be influenced by particular mediators such as frequency and duration of exposure to marketing and knowledge and understanding of health risks.

## METHODS

### Study design

An online cross-sectional survey was conducted between April and June 2017. The survey was developed following cognitive testing with a small sample of young people (n=100) to ensure age and cultural comprehensibility of the questions, some of which were based on well validated questions used in other surveys<sup>21,34-37</sup>. The final survey covered six main themes; exercise levels; food and drink consumption, screen time, recalled marketing exposure, perceptions of marketing and demographic factors.

A total of 3,348 young people, aged 11-19 were recruited by market research company, YouGov, using their in-house panel. YouGov already had data on the children in households of adult in-house panel members. Children over the age of 16 were directly approached and asked if they wished to participate. For those aged under 16, their parents were contacted and asked if their child could participate in the survey. Data collected was weighted by age, gender, ethnicity, region and social grade to be representative of the UK population.

### Measures

#### Deprivation

Level of deprivation was assessed using an area-based measure rather than individual measure of socio-economic status. The Index of Multiple Deprivation (IMD) was coded into five equal quintiles for analysis, ranging from (1) the lowest 20% of deprivation to (5) the highest 20% of respondents. IMD is a measure of the relative deprivation of an area, combining information from seven domains; income deprivation, employment deprivation, education, skills and training deprivation, health deprivation and disability, crime, barriers to housing and services and living environment deprivation<sup>38</sup>.

#### Consumption Behaviours

The survey measured consumption of a range of food and drink products. Participants were asked to report their consumption behaviours from the question 'How often do you usually eat or drink...?' followed by a series of food categories high in fat, salt and sugar including biscuits and cakes, chips, confectionary, crisps, desserts, diet drinks, energy drinks, flavoured yogurts, milk-based drinks, ready meals, sugary drinks, sweetened cereal and take-aways, as well as with healthy items such as fruit and vegetables. These food groups were chosen using previous research on unhealthy products and with reference to the categories included by Public Health England in their sugar reduction programme<sup>39</sup>. Responses were graded on a Likert scale from more than once a day to never, and then converted to binary variables across two coding groups. The groups identified as 'higher' consumption depending on the total calorific content in each food<sup>17,21,39</sup>. The first coding group included sugar sweetened drinks, flavoured yoghurts, confectionary, cakes/biscuits, fruit, vegetables, diet drinks, crisps and desserts where two or more portions a week was considered high consumption. The second coding group included takeaways, ready meals, energy drinks, fried potato products, milk-based drinks and sugar sweetened cereals where one or more portions a week was considered higher consumption. The coding was only calculated for participants who gave an answer, and those who selected 'not sure' were excluded from the final analysis.

#### Screen Time

Commercial screen time was a variable created in the data set based on responses related to frequency and

1  
2  
3 duration of exposure to TV and streaming (on demand) services<sup>21,40</sup>. Participants listed the hours spent  
4 watching both commercial and non-commercial TV and streaming services. This excluded screen time  
5 from computers being used for homework. Non-commercial screen time (which contains no paid for  
6 marketing in the UK context) was shown to not be significant in previous analysis of the data<sup>17-19</sup> and was  
7 therefore removed. Weekend and week-day viewing was then weighted and turned into a weekly measure  
8 and categorised; low (<3 hours per week), medium (3 – 21 hours per week) and high (21 hours or more  
9 per week)<sup>21</sup>.

## 11 Health Knowledge

13 Health knowledge was assessed using the question ‘Which, if any, of the following health conditions do  
14 you think can result from being overweight? Please tick all that apply.’ Options included answers that  
15 were both correct and incorrect to identify the extent of health knowledge. The eight chosen conditions  
16 were; cancer, stroke, heart disease, diabetes type 1, diabetes type 2, migraines, chicken pox and flue.  
17 From this, the results were coded as a binary variable: 0 – unaware; 1 – aware of the links between certain  
18 conditions and being overweight.  
19

## 21 Age and gender

23 Control variables were selected on theoretical importance from a rapid review of the literature<sup>21,37,40-43</sup> and  
24 included gender (coded 0 – Male, 1 – Female) and age (11-19 years).  
25

## 27 ETHICS

29 Ethical approval was obtained in January 2018 from the General University Ethics Panel (GUEP) at the  
30 University of Stirling.  
31

## 32 ANALYSIS

34 Data were analysed using IBM SPSS Version 23. Multiple multivariate binary regression models were  
35 run on the unweighted data to test for associations between deprivation levels and three key behaviours of  
36 young people; consumption behaviours, screen time use and health knowledge. The consumption model  
37 used the dependent binary variables of food and drink consumption behaviours. Models were run  
38 separately for each dependent variable, producing 15 models in total. The screen time model used the  
39 dependent variable of categorised reported screen time hours. The health knowledge model used the  
40 dependent binary variable of awareness of a health condition and its link to overweight and obesity. This  
41 included eight different health conditions, some with identified associations, and some without.  
42

44 Within each of these models the Index of Multiple Deprivation (IMD) variable was used as an  
45 independent variable, with the least deprived quintile as the reference group. Age and gender were  
46 included in the models as control variables, as potentially confounding variables.  
47  
48  
49

## 50 RESULTS

### 52 Sample characteristics

54 Almost half (49%) of the survey respondents were female and 51% male. The mean age of participants  
55 was 14.9 years old (SD = 2.55). The majority (82%) were from white British backgrounds with 18% from  
56  
57  
58  
59

1  
2  
3 other ethnic groups. The majority of respondents lived in England (82%); 5% of respondents lived in  
4 Wales, 8% in Scotland and 3% in Northern Ireland (*Table 1*).

### 8 **Screen time**

9 Of respondents, there were 31.9% in low, 57.1% in medium and 11.0% in high screen time category for  
10 television viewing. For streaming services there was 30.3% in low, 50.7% in medium and 19.0% in high  
11 screen time categories.

### 14 **Deprivation and Consumption Behaviours**

15 The results of the binary logistic regressions showed an association between deprivation and higher  
16 consumption behaviours, for a range of HFSS food products (*Table 2*). The most deprived young people  
17 were significantly more likely to consume energy drinks (OR= 2.943,  $P < 0.001$ ), followed by sugary  
18 drinks (OR= 1.938,  $P < 0.001$ ).

19  
20 In contrast, analysis identified consumption of fruit and vegetables was inversely associated with more  
21 deprived groups. Fruit (OR= 0.668,  $P = 0.004$ ) and vegetables (OR= 0.306,  $P < 0.001$ ) were more likely to  
22 be consumed in lower frequency by the most deprived respondents, when compared to the most affluent  
23 respondents. Therefore, these young people had a reduced likelihood of consuming the healthier options  
24 in higher quantities.

### 27 **Deprivation and Screen Time**

28  
29 Regression analysis found an association between deprivation in young people and high weekly screen  
30 time of both television and streaming (*Table 3*). The model compared 'high' category screen time (21  
31 hours or more a week) to 'medium and low' screen time (less than 21 hours a week) and found those from  
32 the most deprived quintile were significantly more likely to be in the high screen time category than the  
33 more affluent respondents, for both television (OR= 2.477,  $P < 0.001$ ) and streaming (OR= 1.679,  $P =$   
34 0.001).

### 37 **Deprivation and Health Knowledge**

38 The analysis identified an association between deprivation and poorer health knowledge (*Table 4*).  
39 Respondents were asked whether eight health conditions (from a pre-existing list) could occur as a result  
40 of being overweight or obese. There was significantly poorer awareness of the association between cancer  
41 (OR= 0.697,  $P = 0.003$ ), type 2 diabetes (OR= 0.64,  $P = 0.004$ ) and heart disease (OR= 0.519,  $P < 0.001$ )  
42 and obesity for those from the more deprived quintiles. There was also significantly higher association  
43 between incorrectly linking type 1 diabetes (OR= 1.536,  $P < 0.001$ ) and obesity in the most deprived  
44 quintile, compared to the most affluent quintile.  
45  
46  
47  
48  
49  
50  
51  
52  
53  
54  
55  
56  
57  
58  
59

1  
2  
3  
4  
5  
6  
7  
8  
9  
10  
11  
12  
13  
14  
15  
16  
17  
18  
19  
20  
21  
22  
23  
24  
25  
26  
27  
28  
29  
30  
31  
32  
33  
34  
35  
36  
37  
38  
39  
40  
41  
42  
43  
44  
45  
46  
47  
48  
49  
50  
51  
52  
53  
54  
55  
56  
57  
58  
59  
60

For peer review only

## DISCUSSION

Results from this survey identify a clear association between socio-economic deprivation and risk factors that may influence the prevalence of childhood obesity in the UK. Involving a nationally representative sample of young people aged 11-19 across England and each of the devolved nations, it sought to explore whether young people living in more deprived areas reported knowledge and behaviours that may contribute to obesity. The study found that these young people consumed more foods and beverages high in salt sugar and fat, and were conversely less likely to report consumption of fruit and vegetables. In addition, young people living in more deprived communities spent more time watching commercial broadcast media where they could be exposed to HFSS advertising. Less affluent young people also had lower levels of awareness of the preventable health conditions, including cancer, which can arise as a result of obesity.

These results support findings from previous studies on factors influencing childhood obesity but also provide new evidence on the clustering of these factors amongst less affluent groups. It is well established that there is a clear gradient in overweight and obesity by socio-economic status in both adults and young people, with individuals from less affluent communities more likely to carry excess weight compared to their more affluent neighbours<sup>2,25,26,44-46</sup>. More limited research has explored how eating patterns vary by deprivation in young people. This study adds to existing evidence suggesting that greater HFSS consumption and lower levels of fruit and vegetable consumption are more common in less affluent young people<sup>18,47</sup>.

This survey also asked young people about the time they spend watching television and on-demand screening services and calculated 'screen time' using an approach employed in previous studies<sup>17,21</sup>. While higher levels of screen time are associated with sedentary behaviour, which may contribute to obesity, they may also suggest greater exposure to broadcast media marketing including of HFSS foods. Previous research has found that children who spent more time watching commercial TV and on demand programmes in the UK are exposed to more HFSS food marketing than those with lower levels of screen time<sup>24,48</sup>. Viewing more HFSS ads on TV and streaming has been associated with higher HFSS consumption, with the difference between a high consumer and a low consumer being at least 520 junk food products a year<sup>17</sup>.

We also found that young people living in more deprived areas had lower levels of awareness of the links between overweight and obesity and relevant health conditions. Awareness is relevant because evidence relating to other preventable risk factors (such as smoking and alcohol) suggest that health knowledge is relevant as a preliminary step towards changing behaviour, but also, importantly, understanding and support for policies and interventions that may address key factors that drive consumption including restrictions on marketing and pricing of unhealthy products<sup>32,33,49</sup>.

Taken together our findings suggest that inequalities in rates of obesity in young people in the UK may be linked to knowledge and behaviours driven by key aspects of an obesogenic environment. Action to address childhood obesity needs to take into account differential consumption patterns amongst less affluent young people and the factors that may influence these consumption patterns. The introduction of policies and interventions that aim to address these factors, including better information on the health consequences of obesity, reducing exposure to HFSS marketing and other wider population level measures (such as policies to address the price and content of products) should consider and assess their impact on less affluent groups.

### Strengths and limitations of the study

1  
2  
3 This study has a number of limitations. Data are from a single cross-sectional survey, so it is not possible  
4 to determine causation. Responses to each of the key topics of interest including food consumption  
5 patterns, use of streaming services and TV viewing, and awareness of health conditions linked to obesity  
6 were based on self-report and thus subject to mis-reporting or recall bias. The study could not directly  
7 assess exposure to HFSS marketing, although our previous research has explored the relationship between  
8 commercial screen time and exposure and found the two to be related<sup>17,21</sup>, which provides us with greater  
9 confidence that screen time may be a reliable proxy for marketing exposure under current UK marketing  
10 regulations. Finally, overweight and obesity in young people is driven by a wide range of factors beyond  
11 those assessed in this study.  
12  
13

### 14 **Conclusions and future research**

15  
16 Taken together our findings suggest that inequalities in rates of obesity in young people in the UK may be  
17 linked to knowledge and behaviours driven by key aspects of an obesogenic environment. Action to  
18 address childhood obesity needs to take into account differential consumption patterns amongst less  
19 affluent young people and the factors that may influence these consumption patterns. The introduction of  
20 policies and interventions that aim to address these factors, including better information on the health  
21 consequences of obesity, reducing exposure to HFSS marketing and other wider population level  
22 measures (such as policies to address the price and content of products) should consider and assess their  
23 impact on less affluent groups.  
24

25  
26 Future research should explore in more detail a larger number of factors, including, for example, the  
27 affordability and availability of HFSS foods, social norms and the influence of social networks in more  
28 deprived communities and how these influence knowledge and behaviour among more deprived young  
29 people. In addition, studies should assess the impact of changes to the policy and regulatory environment  
30 proposed in the UK and other countries to reduce childhood obesity and how these changes may affect  
31 young people living in communities where obesity rates are highest.  
32  
33

### 34 **FUNDING AND ACKNOWLEDGEMENTS**

35  
36 We are grateful to the Cancer Policy Research Centre, Cancer Research UK for funding the study. The  
37 views expressed are those of the researchers and not necessarily those of the funder.  
38  
39  
40  
41  
42  
43  
44  
45  
46  
47  
48  
49  
50  
51  
52  
53  
54  
55  
56  
57  
58  
59  
60

**Table 1: Sample Demographics of the UK Representative respondents**

|           |                    |       |
|-----------|--------------------|-------|
| Male      | 11 to 12           | 11.0% |
|           | 13 to 15           | 16.0% |
|           | 16 to 17           | 12.0% |
|           | 18 to 19           | 12.0% |
| Female    | 11 to 12           | 10.0% |
|           | 13 to 15           | 16.0% |
|           | 16 to 17           | 11.0% |
|           | 18 to 19           | 12.0% |
| Ethnicity | White              | 82.0% |
|           | BME                | 18.0% |
| IMD       | 1,2                | 20.0% |
|           | 3,4                | 20.0% |
|           | 5,6                | 20.0% |
|           | 7,8                | 20.0% |
|           | 9,10               | 20.0% |
| Region    | North East         | 4.0%  |
|           | North West         | 11.1% |
|           | Yorkshire & Humber | 8.5%  |
|           | East Midlands      | 7.3%  |
|           | West Midlands      | 9.3%  |
|           | East               | 9.3%  |
|           | London             | 12.7% |
|           | South East         | 14.0% |
|           | South West         | 8.2%  |
|           | Wales              | 4.7%  |
|           | Scotland           | 7.8%  |
|           | Northern Ireland   | 3.1%  |

1  
2  
3  
4  
5  
6  
7  
8  
9  
10  
11  
12  
13  
14  
15  
16  
17  
18  
19  
20  
21  
22  
23  
24  
25  
26  
27  
28  
29  
30  
31  
32  
33  
34  
35  
36  
37  
38  
39  
40  
41  
42  
43  
44  
45  
46  
47  
48  
49  
50  
51  
52  
53  
54  
55  
56  
57  
58  
59  
60

For peer review only

Table 2: Consumption behaviours and deprivation. The bolded values indicate significance from the model.

|                    | Consumption Behaviours |                     |                      |                     |                                    |                      |              |
|--------------------|------------------------|---------------------|----------------------|---------------------|------------------------------------|----------------------|--------------|
|                    | Descriptive Findings   |                     |                      |                     | Logistic Regression / Significance |                      |              |
|                    | Most Deprived 20%      |                     | Least Deprived 20%   |                     | Most deprived quintile             |                      |              |
|                    | High Consumption (%)   | Low Consumption (%) | High Consumption (%) | Low Consumption (%) | OR:                                | CI (95%)             | P - value    |
| Biscuits and cakes | 58.4%                  | 41.6%               | 63.6%                | 36.4%               | 0.841                              | 0.638 - 1.038        | 0.097        |
| Chips              | 72.1%                  | 27.9%               | 67.5%                | 32.5%               | 1.259                              | 0.974 - 1.627        | 0.079        |
| Confectionary      | 65.3%                  | 34.7%               | 66.3%                | 33.7%               | 0.962                              | 0.751 - 1.232        | 0.759        |
| Crisps             | 62.8%                  | 37.2%               | 58.5%                | 41.5%               | 1.232                              | 0.965 - 1.572        | 0.093        |
| Desserts           | 47.1%                  | 52.9%               | 55.2%                | 44.8%               | <b>0.732</b>                       | <b>0.576 - 0.930</b> | <b>0.011</b> |
| Diet Drinks        | 35.7%                  | 64.3%               | 31.2%                | 68.8%               | 1.233                              | 0.959 - 1.585        | 0.102        |
| Energy drinks      | 15.6%                  | 84.4%               | 7.0%                 | 93.0%               | <b>2.493</b>                       | <b>1.676 - 3.706</b> | <b>0.000</b> |
| Flavoured yogurts  | 28.0%                  | 72.0%               | 27.3%                | 72.7%               | 1.061                              | 0.812 - 1.386        | 0.067        |
| Fruit              | 71.3%                  | 28.7%               | 78.8%                | 21.2%               | <b>0.668</b>                       | <b>0.507 - 0.879</b> | <b>0.004</b> |
| Milk based drinks  | 31.3%                  | 68.7%               | 22.6%                | 77.4%               | <b>1.613</b>                       | <b>1.229 - 2.118</b> | <b>0.001</b> |
| Ready meals        | 64.3%                  | 35.7%               | 56.3%                | 43.7%               | <b>1.416</b>                       | <b>1.111 - 1.712</b> | <b>0.005</b> |
| Sugary drinks      | 41.6%                  | 58.4%               | 27.2%                | 72.8%               | <b>1.938</b>                       | <b>1.506 - 2.494</b> | <b>0.000</b> |
| Sweetened cereals  | 49.6%                  | 50.4%               | 44.8%                | 55.2%               | 1.253                              | 0.986 - 1.593        | 0.066        |
| Take-aways         | 39.1%                  | 60.9%               | 25.1%                | 74.9%               | <b>1.914</b>                       | <b>1.482 - 2.472</b> | <b>0.000</b> |
| Vegetables         | 78.9%                  | 21.1%               | 92.4%                | 7.6%                | <b>0.306</b>                       | <b>0.211 - 0.442</b> | <b>0.000</b> |

Table 3: Screen-time behaviour and deprivation. The bolded values indicate significance from the model.

|                               | Screen Time Behaviours |                  |                |                      |                  |                |                                    |                      |              |
|-------------------------------|------------------------|------------------|----------------|----------------------|------------------|----------------|------------------------------------|----------------------|--------------|
|                               | Frequency              |                  |                |                      |                  |                | Logistic Regression / Significance |                      |              |
|                               | Most Deprived (20%)    |                  |                | Least Deprived (20%) |                  |                | Most Deprived Quintile             |                      |              |
|                               | Low Viewing %          | Medium Viewing % | High Viewing % | Low Viewing %        | Medium Viewing % | High Viewing % | OR                                 | CI                   | P-Value      |
| <b>Television Screen Time</b> | 25.7%                  | 55.9%            | 18.4%          | 31.7%                | 60.0%            | 8.3%           | <b>2.477</b>                       | <b>1.697 - 3.614</b> | <b>0.000</b> |
| <b>Streaming Screen Time</b>  | 28.2%                  | 46.8%            | 25.0%          | 33.2%                | 50.3%            | 16.5%          | <b>1.679</b>                       | <b>1.234 - 2.283</b> | <b>0.001</b> |

Table 4: Health knowledge and deprivation. The bolded values indicate significance from the model.

|                             | Overall awareness | Frequency                 |                            | Logistic Regression / Significance |                |
|-----------------------------|-------------------|---------------------------|----------------------------|------------------------------------|----------------|
|                             |                   | Most Deprived Awareness % | Least Deprived Awareness % | OR                                 | P Value        |
| <b>Cancer Link</b>          | 42.0%             | 36.1%                     | 44.4%                      | <b>0.697</b>                       | <b>[0.003]</b> |
| <b>Heart Disease Link</b>   | 87.0%             | 83.5%                     | 90.3%                      | <b>0.519</b>                       | <b>[0.000]</b> |
| <b>Stroke Link</b>          | 60.0%             | 62.1%                     | 59.2%                      | 0.862                              | [0.228]        |
| <b>Diabetes Type 1 Link</b> | 39.0%             | 46.1%                     | 36.3%                      | <b>1.536</b>                       | <b>[0.000]</b> |
| <b>Diabetes Type 2 Link</b> | 82.0%             | 78.7%                     | 84.7%                      | <b>0.64</b>                        | <b>[0.004]</b> |
| <b>Flu Link</b>             | 4.0%              | 4.1%                      | 2.7%                       | 1.544                              | [0.196]        |
| <b>Chicken Pox Link</b>     | 1.0%              | 0.4%                      | 0.7%                       | 0.558                              | [0.502]        |
| <b>Migraine Link</b>        | 14.0%             | 11.0%                     | 11.8%                      | 0.907                              | [0.604]        |

## References

1. National Child Measurement Programme (NCMP): Trends in child BMI. Public Health England; 2017.
2. Patterns and Trends in Child Obesity. 2017. <https://www.gov.uk/guidance/phe-data-and-analysis-tools#obesity-diet-and-physical-activity2018>.
3. Simmonds M, Llewellyn A, Owen CG, Woolacott N. Predicting adult obesity from childhood obesity: a systematic review and meta-analysis. *Obes Rev* 2016; **17**(2): 95-107.
4. Parkin DM, Boyd L. 8. Cancers attributable to overweight and obesity in the UK in 2010. *Br J Cancer* 2011; **105 Suppl 2**: S34-7.
5. Ades PA, Savage PD. Obesity in coronary heart disease: An unaddressed behavioral risk factor. *Prev Med* 2017; **104**: 117-9.
6. Brown KF, Rungay H, Dunlop C, et al. The fraction of cancer attributable to modifiable risk factors in England, Wales, Scotland, Northern Ireland, and the United Kingdom in 2015. *Br J Cancer* 2018; **118**(8): 1130-41.
7. Adult obesity and type 2 diabetes. Public Health England; 2014.
8. Organization. WH. Global Health Risks-Mortality and burden of disease attributable to selected major risks  
*The Lancet* 2015.
9. Bleich S, Cutler D, Murray C, Adams A. Why is the developed world obese? *Annu Rev Public Health* 2008; **29**: 273-95.
10. Ebbeling CB, Pawlak DB, Ludwig DS. Childhood obesity: public-health crisis, common sense cure. *Lancet* 2002; **360**(9331): 473-82.
11. Reilly JJ. Obesity in childhood and adolescence: evidence based clinical and public health perspectives. *Postgrad Med J* 2006; **82**(969): 429-37.
12. Afshin A, Penalvo JL, Del Gobbo L, et al. The prospective impact of food pricing on improving dietary consumption: A systematic review and meta-analysis. *PLoS One* 2017; **12**(3): e0172277.
13. Vandevijvere S, Chow CC, Hall KD, Umali E, Swinburn BA. Increased food energy supply as a major driver of the obesity epidemic: a global analysis. *Bull World Health Organ* 2015; **93**(7): 446-56.
14. Alliance OH. Health costs of obesity soaring as junk food companies pour millions into advertising. 2017.
15. Powell L, Harris J, Fox T. Food Marketing Expenditures Aimed at Youth Putting the Numbers in Context. *American Journal of Preventative Medicine* 2014; **45**(4): 453-61.
16. Story M, French S. Food Advertising and Marketing Directed at Children and Adolescents in the US. *Int J Behav Nutr Phys Act* 2004; **1**(1): 3.
17. Thomas C, Hooper L, Petty R, Thomas F, Rosenberg G, Vohra J. 10 Years On: Cancer Research UK, 2018.
18. Thomas C, Hooper L, Petty R, Thomas F, Rosenberg G, Vohra J. Under Pressure: New evidence on young people's broadcast marketing exposure in the UK: Cancer Research UK, 2018.
19. Thomas F, Hooper L, Petty R, Thomas C, Rosenberg G, Vohra J. A Prime Time for Action: New evidence on the link between television and on-demand marketing and obesity: Cancer Research UK, 2018.
20. Boyland EJ, Nolan S, Kelly B, et al. Advertising as a cue to consume: a systematic review and meta-analysis of the effects of acute exposure to unhealthy food and nonalcoholic beverage advertising on intake in children and adults. *Am J Clin Nutr* 2016; **103**(2): 519-33.
21. Scully M, Wakefield M, Niven P, et al. Association between food marketing exposure and adolescents' food choices and eating behaviors. *Appetite* 2012; **58**(1): 1-5.

22. Halford JC, Boyland EJ, Hughes G, Oliveira LP, Dovey TM. Beyond-brand effect of television (TV) food advertisements/commercials on caloric intake and food choice of 5-7-year-old children. *Appetite* 2007; **49**(1): 263-7.
23. National Child Measurement Programme. Changes in children's body mass index between 2006/07 and 2015/16.: Public Health England, 2017.
24. Boyland EJ, Harrold JA, Kirkham TC, Halford JC. The extent of food advertising to children on UK television in 2008. *International Journal of Pediatric Obesity* 2011; **6**(5-6): 455-61.
25. Wang Y. Cross-national comparison of childhood obesity: the epidemic and the relationship between obesity and socioeconomic status. *Int J Epidemiol* 2001; **30**(5): 1129-36.
26. England PH. Severe obesity in ten to eleven year olds reaches record high. In: Mills J, editor.: Public Health England; 2018.
27. A Healthier Future - Scotland's Diet and Healthy Weight Delivery Plan. Edinburgh: Scottish Government, 2018.
28. Department of Health and Social Care: Global Public Health Directorate: Obesity FaN. Childhood Obesity: a plan for action. Chapter 2: HM Government, 2018.
29. Swinburn BA. Obesity prevention: the role of policies, laws and regulations. *Aust New Zealand Health Policy* 2008; **5**: 12.
30. WHO. World Health Organisation: Obesity and Overweight. 2017. <http://www.who.int/en/news-room/fact-sheets/detail/obesity-and-overweight> (accessed 24.07.18 2018).
31. Hooper L, Anderson A, Birch J, et al. Public awareness and healthcare professional advice for obesity as a risk factor for cancer in the UK: a cross-sectional survey. *Journal of Public Health* 2017.
32. Buykx P, Li J, Lovatt M, et al. An Examination of Public Attitudes Towards Alcohol Policy: University of Sheffield and Cancer Research UK, 2016.
33. Bates S, Holmes J, Gavens L, et al. Awareness of alcohol as a risk factor for cancer is associated with public support for alcohol policies. *BMC Public Health* 2018; **18**(1): 688.
34. England. PH. National Diet and Nutrition Survey. 2016. <https://www.gov.uk/government/collections/national-diet-and-nutrition-survey> (accessed 03.01.18 2018).
35. Marketing IoS. Food Choice Survey: University of Stirling, 2007.
36. Alcohol (Minimum Unit) Pricing Act 2012. [http://www.legislation.gov.uk/asp/2012/4/pdfs/asp\\_20120004\\_en.pdf](http://www.legislation.gov.uk/asp/2012/4/pdfs/asp_20120004_en.pdf).
37. Morley BC, Scully ML, Niven PH, et al. What factors are associated with excess body weight in Australian secondary school students? *Med J Aust* 2012; **196**(3): 189-92.
38. Government. DfCaL. The English Index of Multiple Deprivation (IMD) - Guidance, 2015.
39. Sugar Reduction: Achieving the 20%: Public Health England, 2017.
40. Dixon HG, Scully ML, Wakefield MA, White VM, Crawford DA. The effects of television advertisements for junk food versus nutritious food on children's food attitudes and preferences. *Soc Sci Med* 2007; **65**(7): 1311-23.
41. Denny S, Lewycka S, Utter J, et al. The association between socioeconomic deprivation and secondary school students' health: findings from a latent class analysis of a national adolescent health survey. *Int J Equity Health* 2016; **15**(1): 109.
42. Nestle M. Food marketing and childhood obesity--a matter of policy. *N Engl J Med* 2006; **354**(24): 2527-9.
43. Cooke LJ, Wardle J. Age and gender differences in children's food preferences. *Br J Nutr* 2005; **93**(5): 741-6.
44. Stamatakis E, Wardle J, Cole TJ. Childhood obesity and overweight prevalence trends in England: evidence for growing socioeconomic disparities. *Int J Obes (Lond)* 2010; **34**(1): 41-7.

- 1  
2  
3 45. McLaren L. Socioeconomic status and obesity. *Epidemiol Rev* 2007; **29**: 29-48.
- 4 46. Bann D, Johnson W, Li L, Kuh D, Hardy R. Socioeconomic Inequalities in Body Mass Index across  
5 Adulthood: Coordinated Analyses of Individual Participant Data from Three British Birth Cohort Studies  
6 Initiated in 1946, 1958 and 1970. *PLoS Med* 2017; **14**(1): e1002214.
- 7 47. Crawford B, Byun R, Mitchell E, Thompson S, Jalaludin B, Torvaldsen S. Socioeconomic  
8 differences in the cost, availability and quality of healthy food in Sydney. *Aust N Z J Public Health* 2017;  
9 **41**(6): 567-71.
- 10 48. Campbell D. Children seeing up to 12 adverts for junk food an hour on TV, study finds. 2017.  
11 [https://www.theguardian.com/society/2017/nov/28/children-seeing-up-to-12-adverts-for-junk-food-](https://www.theguardian.com/society/2017/nov/28/children-seeing-up-to-12-adverts-for-junk-food-an-hour-on-tv-study-finds)  
12 [an-hour-on-tv-study-finds](https://www.theguardian.com/society/2017/nov/28/children-seeing-up-to-12-adverts-for-junk-food-an-hour-on-tv-study-finds) (accessed 23.07.18 2018).
- 13 49. Bryant T. Role of knowledge in public health and health promotion policy change. *Health Promot*  
14 *Int* 2002; **17**(1): 89-98.
- 15  
16  
17  
18  
19  
20  
21  
22  
23  
24  
25  
26  
27  
28  
29  
30  
31  
32  
33  
34  
35  
36  
37  
38  
39  
40  
41  
42  
43  
44  
45  
46  
47  
48  
49  
50  
51  
52  
53  
54  
55  
56  
57  
58  
59  
60

# BMJ Open

## Area deprivation, screen time and HFSS consumption in young people: Results from a cross sectional study in the UK

|                                 |                                                                                                                                                                                                                                                                                                                                                                                                                                                                                           |
|---------------------------------|-------------------------------------------------------------------------------------------------------------------------------------------------------------------------------------------------------------------------------------------------------------------------------------------------------------------------------------------------------------------------------------------------------------------------------------------------------------------------------------------|
| Journal:                        | <i>BMJ Open</i>                                                                                                                                                                                                                                                                                                                                                                                                                                                                           |
| Manuscript ID                   | bmjopen-2018-027333.R1                                                                                                                                                                                                                                                                                                                                                                                                                                                                    |
| Article Type:                   | Research                                                                                                                                                                                                                                                                                                                                                                                                                                                                                  |
| Date Submitted by the Author:   | 26-Feb-2019                                                                                                                                                                                                                                                                                                                                                                                                                                                                               |
| Complete List of Authors:       | Thomas, Fiona; Cancer Research UK, Cancer Prevention<br>Thomas, Christopher; Cancer Research UK, Policy Research Centre for Cancer Prevention<br>Hooper, Lucie; Cancer Research UK, Policy Research Centre for Cancer Prevention<br>Rosenberg, Gillian; Cancer Research UK, Policy Research Centre for Cancer Prevention<br>Vohra, Jyotsna; Cancer Research UK, Cancer Prevention<br>Bauld, Linda; University of Edinburgh, Usher Institute of Population Health Sciences and Informatics |
| <b>Primary Subject Heading</b>: | Public health                                                                                                                                                                                                                                                                                                                                                                                                                                                                             |
| Secondary Subject Heading:      | Nutrition and metabolism, Health policy, Public health                                                                                                                                                                                                                                                                                                                                                                                                                                    |
| Keywords:                       | young people, inequalities, consumption, screen time, health knowledge, deprivation                                                                                                                                                                                                                                                                                                                                                                                                       |
|                                 |                                                                                                                                                                                                                                                                                                                                                                                                                                                                                           |

SCHOLARONE™  
Manuscripts

1  
2  
3 **Area deprivation, screen time and HFSS consumption in young people: Results**  
4 **from a cross sectional study in the UK**  
5

6 **Fiona Thomas<sup>1</sup>, Christopher Thomas<sup>1</sup>, Lucie Hooper<sup>1</sup>, Gillian Rosenberg<sup>1</sup>, Jyotsna Vohra<sup>1</sup>**  
7 **and Linda Bauld<sup>1,2</sup>**

8 <sup>1</sup>Cancer Policy Research Centre, Cancer Research UK

9 <sup>2</sup>Usher Institute, University of Edinburgh  
10  
11

12 **Key words:** Obesity, Young people, Inequalities, Consumption, Screen time, Health Knowledge,  
13 Deprivation  
14

15 **Correspondence to:** Fiona Thomas, Cancer Research UK, Angel Building, 407 St. John Street  
16 London, EC1V 4AD  
17

18 **Contact Details:**

19  
20  
21 Fiona Thomas – [fiona.thomas@hotmail.com](mailto:fiona.thomas@hotmail.com)

22 Christopher Thomas – [Christopher.Thomas@cancer.org.uk](mailto:Christopher.Thomas@cancer.org.uk)

23 Lucie Hooper – [Lucie.Hooper@cancer.org.uk](mailto:Lucie.Hooper@cancer.org.uk)

24 Gillian Rosenberg – [Gillian.Rosenberg@cancer.org.uk](mailto:Gillian.Rosenberg@cancer.org.uk)

25 Jyotsna Vohra – [Jyotsna.Vohra@cancer.org.uk](mailto:Jyotsna.Vohra@cancer.org.uk)

26 Linda Bauld – [Linda.Bauld@ed.ac.uk](mailto:Linda.Bauld@ed.ac.uk)  
27  
28

29 **Word Count:** 3096

30  
31 **Number of Tables:** 4

32 **Number of References:** 51  
33  
34  
35  
36  
37  
38

39 **Corresponding Author:**

40  
41 Fiona Thomas

42 Cancer Policy Research Centre

43 Cancer Research UK

44 Angel Building

45 407 St. John Street

46 London

47 EC1V 4AD

48 United Kingdom

49 Tel - 020 3469 6357

50 Email - [fiona.thomas@hotmail.com](mailto:fiona.thomas@hotmail.com)  
51  
52  
53  
54  
55  
56  
57  
58  
59  
60

## Abstract

**Objectives:** To investigate associations between deprivation in young people and consumption of foods high in fat, salt and sugar (HFSS), screen time exposure and health knowledge.

**Design:** An online cross-sectional survey with 11-19-year olds in the UK, where participants reported consumption behaviours across 13 HFSS and two non-HFSS groups; screen time for commercial television and streaming services; and knowledge of health conditions and their links to obesity.

**Setting:** United Kingdom

**Participants:** 3,348 young people aged 11-19 across the United Kingdom (UK).

**Main outcome measures:** The study assessed the consumption behaviours, commercial screen time exposure and the health knowledge of 3,348 11-19-year olds. Multivariate binary regression analysis, controlling for age and gender, was performed.

**Results:** Deprivation level was associated with increases in consumption of six of the HFSS products including energy drinks (OR:2.943 /  $P < 0.001$ ) and sugary drinks (OR:1.938,  $P < 0.001$ ), and a reduction in consumption in the two non-HFSS products included in the study; fruit (OR:0.668 /  $P = 0.004$ ) and vegetables (OR:0.306 /  $P < 0.001$ ). Deprivation was associated with high weekly screen time of both television (OR:2.477 /  $P < 0.001$ ) and streaming (OR:1.679 /  $P = 0.001$ ). Health knowledge was also associated with deprivation. There was lower awareness of the association of obesity and cancer (OR:0.697 /  $P = 0.003$ ) type 2 diabetes (OR:0.64 /  $P = 0.004$ ) and heart disease (OR:0.519 /  $P < 0.001$ ) in the most deprived.

**Conclusions:** Young people from the more deprived areas of the UK were more likely to consume of a range of HFSS products, report increased exposure to HFSS advertising and have a poorer awareness of health conditions associated with overweight and obesity. The findings suggest that population level measures addressing childhood obesity should account for consumption patterns among different groups of children and young people and the factors that may influence these.

### Strengths and limitations of this study

- The study identified an association between socio-economic deprivation and risk factors that may influence the prevalence of childhood obesity in the UK through a nationally representative sample of young people aged 11-19 across England and each of the devolved nations.
- Data collected for this study was from a single cross-sectional survey, so it is not possible to determine causation between the variables.
- The study could not directly assess exposure to marketing of foods high in fat, salt and sugar (HFSS), although previous research that had explored the relationship between commercial screen time and exposure and found the two to be related, provided us with greater confidence that screen time may be a reliable proxy for marketing exposure under current UK marketing regulations.

1  
2  
3 **‘What this paper adds’ box**  
4

5 Section 1: What is already known on this topic?  
6

- 7
- 8 - Obesity is a complex health condition with multiple drivers
  - 9 - The most deprived groups are more likely to suffer from negative health outcomes, including  
10 those caused by higher rates of childhood obesity.
  - 11 - An association between greater exposure to junk food marketing and obesity has been found  
12 in previous research.
  - 13 - To date, associations between deprivation, HFSS marketing and obesity in young people have  
14 not been fully investigated.
- 15

16 Section 2: What this study adds  
17

- 18 - Young people living in more deprived areas reported higher levels of weekly screen time  
19 exposure from both television and streaming services.
  - 20 - The most deprived young people were more likely to consume six of thirteen food and drink  
21 categories that are high in fat, salt and sugar (HFSS) and were less likely to consume foods in  
22 the two non-HFSS categories included in the study.
  - 23 - There was lower awareness of the association between obesity and relevant health conditions  
24 such as heart disease, cancer and type 2 diabetes among the most deprived respondents.
  - 25 - Future policies and interventions to address childhood obesity should take into account how  
26 these might affect young people living in more deprived communities
- 27  
28  
29  
30  
31  
32  
33  
34  
35  
36  
37  
38  
39  
40  
41  
42  
43  
44  
45  
46  
47  
48  
49  
50  
51  
52  
53  
54  
55  
56  
57  
58  
59  
60

## BACKGROUND

In the UK, around 30% of children are overweight or obese<sup>1</sup> the highest rate of childhood obesity in Europe. This overall figure masks considerable disparities by socioeconomic status. Overweight and obesity prevalence for children in the 10% most deprived areas in England, for example, is more than double that of those who live in the least deprived 10%<sup>2</sup>. Longer term, an obese child is around five times more likely to become an obese adult<sup>3</sup>, and there is substantial evidence that obesity in adulthood directly contributes to the development of conditions such as diabetes, coronary heart disease, stroke and 13 different types of cancer<sup>4-8</sup>.

Previous studies have provided diverse explanations for the rise in levels of obesity, ranging from genetics, increased calorie intake, an increase in sedentary behaviour or a combination of factors<sup>9-11</sup>. The calorie intake increase is thought to be the most significant influence accounting for this rise, caused by a range of environmental factors<sup>9,12,13</sup>, including the role of the marketing and promotion of foods that are high in fat, salt and sugar (HFSS), often referred to as 'junk foods'. Marketing of these foods is extensive and delivered through a variety of platforms including television, streaming, price promotions and print media. Studies have identified a substantial expenditure by manufacturers and retailers on the marketing of junk food to children and young adults<sup>14, 15</sup>, and identified that industry recognises the potential marketing has for influencing consumption choices<sup>16</sup>. The link between marketing and weight outcomes, as well as increased consumption of HFSS products has been highlighted by a number of previous studies<sup>17-23</sup>. Assessing exposure to HFSS marketing via self-reported recall of viewing advertisements does have limitations. Thus some studies have used commercial screen time as a proxy for TV and online marketing exposure<sup>17, 21</sup>, whereby greater screen time indicates increased exposure to HFSS advertising. Prior content analysis of UK television, where young people make up a large proportion of the audience, highlighted the increased likelihood of HFSS marketing exposure<sup>24</sup>, supporting this proxy measure.

Increasingly, there is a need to identify how marketing and promotion affect children in different social groups or those living in more, or less deprived communities. Studies have previously identified an association between socioeconomic status and obesity<sup>25, 26</sup>. Highlighting such associations between socioeconomic status and contributing factors to obesity, such as exposure to HFSS advertising, are important in identifying interventions or policy actions that can contribute to addressing the public health problem. Halting or reversing current obesity trends is a current priority for public health policies in the UK<sup>27, 28</sup>, and globally<sup>29, 30</sup>.

Hooper et al<sup>31</sup>, identified that there is a low level of public awareness of the link between overweight and obesity and resulting preventable health conditions, including cancer. Only 25% of the UK adult population are aware of this link and this lack of awareness is more prevalent in less affluent groups. Other studies have also found an association between greater health awareness and increased support for policy change, particularly for alcohol policy<sup>32, 33</sup>. Greater health knowledge may therefore affect how young people view the acceptability of HFSS marketing and also consumption choices.

To date, there is limited research on the association between deprivation, HFSS marketing and obesity. Given these gaps, this study aims to investigate whether such a relationship exists and how it might be influenced by particular mediators such as frequency and duration of exposure to marketing and knowledge and understanding of health risks.

## METHODS

### Study design

An online cross-sectional survey was conducted between April and June 2017. The survey was developed following cognitive testing with a small sample of young people (n=100) to ensure age and cultural comprehensibility of the questions, some of which were based on well validated questions used in other surveys<sup>21, 34-37</sup>. The final survey covered six main themes; exercise levels; food and drink consumption, screen time, recalled marketing exposure, perceptions of marketing and demographic factors.

A total of 3,348 young people, aged 11-19 were recruited by market research company, YouGov, using their in-house panel. YouGov already had data on the children in households of adult in-house panel members. Children over the age of 16 were directly approached and asked if they wished to participate. For those aged under 16, their parents were contacted and asked if their child could participate in the survey. Data collected was weighted by age, gender, ethnicity, region and social grade to be representative of the UK population.

### Measures

#### Deprivation

Level of deprivation was assessed using an area-based measure rather than individual measure of socio-economic status. The Index of Multiple Deprivation (IMD) was coded into five equal quintiles for analysis, ranging from (1) the lowest 20% of deprivation to (5) the highest 20% of respondents. IMD is a measure of the relative deprivation of an area, combining information from seven domains; income deprivation, employment deprivation, education, skills and training deprivation, health deprivation and disability, crime, barriers to housing and services and living environment deprivation<sup>38</sup>.

#### Consumption Behaviours

The survey measured consumption of a range of food and drink products. Participants were asked to report their consumption behaviours from the question 'How often do you usually eat or drink...?' followed by a series of food categories high in fat, salt and sugar including biscuits and cakes, chips, confectionary, crisps, desserts, energy drinks, flavoured yogurts, milk-based drinks, ready meals, sugary drinks, sweetened cereal and take-aways, as well as with healthy items such as fruit and vegetables. These food groups were chosen using previous research on unhealthy products and with reference to the categories included by Public Health England in their sugar reduction programme<sup>39</sup>. Responses were graded on a Likert scale from more than once a day to never, and then converted to binary variables across two coding groups. The groups identified as 'higher' consumption depending on the total calorific content in each food<sup>17, 21, 39</sup>. The first coding group included sugar sweetened drinks, flavoured yoghurts, confectionary, cakes/biscuits, fruit, vegetables, diet drinks, crisps and desserts where two or more portions a week was considered high consumption<sup>39</sup>. The second coding group included takeaways, ready meals, energy drinks, fried potato products, milk-based drinks and sugar sweetened cereals where one or more portions a week was considered higher consumption<sup>39</sup>. The coding was only calculated for participants who gave an answer, and those who selected 'not sure' were excluded from the final analysis.

#### Screen Time

Commercial screen time was a variable created in the data set based on responses related to frequency and duration of exposure to TV and streaming (on demand) services<sup>21, 40</sup>. Participants listed the hours

1  
2  
3 spent watching both commercial and non-commercial TV and streaming services. This excluded  
4 screen time from computers being used for homework. Non-commercial screen time (which contains  
5 no paid for marketing in the UK context) was shown to not be significant in previous analysis of the  
6 data<sup>17-19</sup> and was therefore removed. Weekend and week-day viewing was then weighted and turned  
7 into a weekly measure and categorised; low (<3 hours per week), medium (3 – 21 hours per week)  
8 and high (21 hours or more per week)<sup>21</sup>.

### 10 Health Knowledge

11  
12 Health knowledge was assessed using the question ‘Which, if any, of the following health conditions  
13 do you think can result from being overweight? Please tick all that apply.’ Options included answers  
14 that were both correct and incorrect to identify the extent of health knowledge. The eight chosen  
15 conditions were; cancer, stroke, heart disease, diabetes type 1, diabetes type 2, migraines, chicken pox  
16 and flu. From this, the results were coded as a binary variable: 0 – unaware; 1 – aware of the links  
17 between certain conditions and being overweight.  
18

### 19 Age and gender

20  
21 Control variables were selected on theoretical importance from a rapid review of the literature<sup>21, 37, 40-43</sup>  
22 and included gender (coded 0 – Male, 1 – Female) and age (11-19 years).  
23

### 24 Patient and Public Involvement

25  
26 Prior to the development of the survey qualitative research was carried out by colleagues at the  
27 University of Stirling and National Centre for Social Research. This work consulted young people  
28 through focus groups, on the design and design and content of the questionnaire. Results of these  
29 focus group discussions were published in a Cancer Research UK report “*It’s Just There To Trick*  
30 *You*”<sup>44</sup>. This PPI development work involved discussion of relevant research questions related to food  
31 and beverage consumption, relevant policy issues (i.e. exposure to food marketing, pricing,  
32 availability), use of broadcast media examples and the appropriateness of questions relating to socio-  
33 demographic characteristics. Questions included in the resulting survey were then trialled with young  
34 people using cognitive interviewing techniques as described above. Survey reports are publicly  
35 available on Cancer Policy Research Centre’s website.  
36  
37

### 38 ETHICS

39  
40 Ethical approval was obtained in January 2018 from the General University Ethics Panel (GUEP) at  
41 the University of Stirling. This ethical approval covered both cognitive testing of the questionnaires  
42 and the online surveys. YouGov’s staff included lead for ethical and quality assurance, to ensure  
43 adherence to best practice throughout testing and data collection. This included ensuring informed  
44 consent was obtained from participants, links were provided to relevant support organisations should  
45 participants wish to contact them and confidentiality of personal information was assured.  
46  
47

### 48 ANALYSIS

49  
50 Data were analysed using IBM SPSS Version 23. Multiple multivariate binary regression models  
51 were run on the unweighted data to test for associations between deprivation levels and three key  
52 behaviours of young people; consumption behaviours, screen time use and health knowledge. The  
53 consumption model used the dependent binary variables of food and drink consumption behaviours.  
54 Models were run separately for each dependent variable, producing 15 models in total. The screen  
55 time model used the dependent variable of categorised reported screen time hours. The health  
56 knowledge model used the dependent binary variable of awareness of a health condition and its link to  
57  
58  
59  
60

1  
2  
3 overweight and obesity. This included eight different health conditions, some with identified  
4 associations, and some without.  
5

6 Within each of these models the Index of Multiple Deprivation (IMD) variable was used as an  
7 independent variable, with the least deprived quintile as the reference group. Age and gender were  
8 included in the models as control variables, as potentially confounding variables.  
9

## 10 RESULTS

### 11 Sample characteristics

12 Almost half (49%) of the survey respondents were female and 51% male. The mean age of  
13 participants was 14.9 years old (SD = 2.55). The majority (82%) were from white British backgrounds  
14 with 18% from other ethnic groups. The majority of respondents lived in England (82%); 5% of  
15 respondents lived in Wales, 8% in Scotland and 3% in Northern Ireland (*Table 1*).  
16  
17  
18

### 19 Screen time

20 Of respondents, there were 31.9% in low, 57.1% in medium and 11.0% in high screen time category  
21 for television viewing. For streaming services there was 30.3% in low, 50.7% in medium and 19.0%  
22 in high screen time categories.  
23  
24

### 25 Deprivation and Consumption Behaviours

26 The results of the binary logistic regressions showed an association between deprivation and higher  
27 consumption behaviours, for a range of HFSS food products (*Table 2*). The most deprived young  
28 people were significantly more likely to consume energy drinks (OR= 2.943,  $P < 0.001$ ), followed by  
29 sugary drinks (OR= 1.938,  $P < 0.001$ ).  
30  
31

32 In contrast, analysis identified consumption of fruit and vegetables was inversely associated with  
33 more deprived groups. Fruit (OR= 0.668,  $P = 0.004$ ) and vegetables (OR= 0.306,  $P < 0.001$ ) were  
34 more likely to be consumed in lower frequency by the most deprived respondents, when compared to  
35 the most affluent respondents, as per the use of IMD. Therefore, these young people had a reduced  
36 likelihood of consuming the healthier options in higher quantities.  
37

### 38 Deprivation and Screen Time

39 Regression analysis found an association between deprivation in young people and high weekly  
40 screen time of both television and streaming (*Table 3*). The model compared 'high' category screen  
41 time (21 hours or more a week) to 'medium and low' screen time (less than 21 hours a week) and  
42 found those from the most deprived quintile were significantly more likely to be in the high screen  
43 time category than the more affluent respondents, for both television (OR= 2.477,  $P < 0.001$ ) and  
44 streaming (OR= 1.679,  $P = 0.001$ ).  
45  
46  
47

### 48 Deprivation and Health Knowledge

49 The analysis identified an association between deprivation and poorer health knowledge (*Table 4*).  
50 Respondents were asked whether eight health conditions (from a pre-existing list) could occur as a  
51 result of being overweight or obese. There was significantly poorer awareness of the association  
52 between cancer (OR= 0.697,  $P = 0.003$ ), type 2 diabetes (OR= 0.64,  $P = 0.004$ ) and heart disease  
53 (OR= 0.519,  $P < 0.001$ ) and obesity for those from the more deprived quintiles. There was also  
54 significantly higher association between incorrectly linking type 1 diabetes (OR= 1.536,  $P < 0.001$ )  
55 and obesity in the most deprived quintile, compared to the most affluent quintile.  
56  
57  
58  
59  
60

## DISCUSSION

Results from this survey identify a clear association between socio-economic deprivation and risk factors that may influence the prevalence of childhood obesity in the UK. Involving a nationally representative sample of young people aged 11-19 across England and each of the devolved nations, it sought to explore whether young people living in more deprived areas reported knowledge and behaviours that may contribute to obesity. The study found that these young people consumed more foods and beverages high in salt sugar and fat, and were conversely less likely to report consumption of fruit and vegetables. In addition, young people living in more deprived communities spent more time watching commercial broadcast media where they could be exposed to HFSS advertising. Young people living in less affluent areas also had lower levels of awareness of the preventable health conditions, including cancer, which can arise as a result of obesity.

These results support findings from previous studies on factors influencing childhood obesity but also provide new evidence on the clustering of these factors amongst less affluent groups. It is well established that there is a clear gradient in overweight and obesity by socio-economic status in both adults and young people, with individuals from less affluent communities more likely to carry excess weight compared to their more affluent neighbours<sup>2, 25, 26, 45-47</sup>. More limited research has explored how eating patterns vary by deprivation in young people. This study adds to existing evidence suggesting that greater HFSS consumption and lower levels of fruit and vegetable consumption are more common in less affluent young people<sup>18, 48</sup>.

This survey also asked young people about the time they spend watching television and on-demand screening services and calculated 'screen time' using an approach employed in previous studies<sup>17, 21</sup>. While higher levels of screen time are associated with sedentary behaviour, which may contribute to obesity, they may also suggest greater exposure to broadcast media marketing including of HFSS foods. Previous research has found that children who spent more time watching commercial TV and on demand programmes in the UK are exposed to more HFSS food marketing than those with lower levels of screen time<sup>24, 49</sup>. Viewing more HFSS ads on TV and streaming has been associated with higher HFSS consumption, with the difference between a high consumer and a low consumer being at least 520 junk food products a year<sup>17</sup>.

We also found that young people living in more deprived areas had lower levels of awareness of the links between overweight and obesity and relevant health conditions. Awareness is relevant because evidence relating to other preventable risk factors (such as smoking and alcohol) suggest that health knowledge is relevant as a preliminary step towards changing behaviour, but also, importantly, understanding and support for policies and interventions that may address key factors that drive consumption including restrictions on marketing and pricing of unhealthy products<sup>32, 33, 50, 51</sup>.

Taken together our findings suggest that inequalities in rates of obesity in young people in the UK may be linked to knowledge and behaviours driven by key aspects of an obesogenic environment. Action to address childhood obesity needs to take into account differential consumption patterns amongst less affluent young people and the factors that may influence these consumption patterns. The introduction of policies and interventions that aim to address these factors, including better information on the health consequences of obesity, reducing exposure to HFSS marketing and other wider population level measures (such as policies to address the price and content of products) should consider and assess their impact on less affluent groups.

### Strengths and limitations of the study

This study has a number of limitations. Data are from a single cross-sectional survey, so it is not possible to determine causation. The measure of deprivation used was an areas-based measure (IMD) which has limitations, as individual or household deprivation may vary within areas. Young people may have limited knowledge and awareness of different health conditions, for example the distinction

1  
2  
3 between Type 1 and Type II diabetes and therefore responses to the question relating to health  
4 conditions may in part reflect this lack of understanding. Responses to each of the key topics of  
5 interest including food consumption patterns, use of streaming services and TV viewing, and  
6 awareness of health conditions linked to obesity were based on self-report and thus subject to mis-  
7 reporting or recall bias. The study could not directly assess exposure to HFSS marketing, although our  
8 previous research has explored the relationship between commercial screen time and exposure and  
9 found the two to be related<sup>17, 21</sup>, which provides us with greater confidence that screen time may be a  
10 reliable proxy for marketing exposure under current UK marketing regulations. Finally, overweight  
11 and obesity in young people is driven by a wide range of factors beyond those assessed in this study.  
12  
13

### 14 **Conclusions and future research**

15  
16 Taken together our findings suggest that inequalities in rates of obesity in young people in the UK  
17 may be linked to knowledge and behaviours driven by key aspects of an obesogenic environment.  
18 Action to address childhood obesity needs to take into account differential consumption patterns  
19 amongst less affluent young people and the factors that may influence these consumption patterns.  
20 The introduction of policies and interventions that aim to address these factors, including better  
21 information on the health consequences of obesity, reducing exposure to HFSS marketing and other  
22 wider population level measures (such as policies to address the price and content of products) should  
23 consider and assess their impact on less affluent groups.  
24

25  
26 Future research should explore in more detail a larger number of factors, including, for example, the  
27 affordability and availability of HFSS foods, social norms and the influence of social networks in  
28 more deprived communities and how these influence knowledge and behaviour among more deprived  
29 young people. In addition, studies should assess the impact of changes to the policy and regulatory  
30 environment proposed in the UK and other countries to reduce childhood obesity and how these  
31 changes may affect young people living in communities where obesity rates are highest.  
32  
33

### 34 **FUNDING AND ACKNOWLEDGEMENTS**

35  
36 We are grateful to the Cancer Policy Research Centre, Cancer Research UK for funding the study.  
37 The views expressed are those of the researchers and not necessarily those of the funder.  
38

### 39 **CONTRIBUTORSHIP STATEMENT**

40  
41 Fiona Thomas carried out the majority of the analysis for this publication along with Chris Thomas  
42 and Lucie Hooper who also developed the questions for the survey. Gillian Rosenberg contributed to  
43 the preparation of the manuscript and analysis plan. Both Jyotsna Vohra and Linda Bauld contributed  
44 to the study design and concept and the preparation of the manuscript.  
45

### 46 **COMPETING INTERESTS**

47  
48 None  
49

### 50 **DATA SHARING AGREEMENT**

51  
52 Data can be made available on request  
53  
54  
55  
56  
57  
58  
59  
60

**Table 1: Sample Demographics of the UK Representative respondents**

|           |                    |       |
|-----------|--------------------|-------|
| Male      | 11 to 12           | 11.0% |
|           | 13 to 15           | 16.0% |
|           | 16 to 17           | 12.0% |
|           | 18 to 19           | 12.0% |
| Female    | 11 to 12           | 10.0% |
|           | 13 to 15           | 16.0% |
|           | 16 to 17           | 11.0% |
|           | 18 to 19           | 12.0% |
| Ethnicity | White              | 82.0% |
|           | BME                | 18.0% |
| IMD       | 1,2                | 20.0% |
|           | 3,4                | 20.0% |
|           | 5,6                | 20.0% |
|           | 7,8                | 20.0% |
|           | 9,10               | 20.0% |
| Region    | North East         | 4.0%  |
|           | North West         | 11.1% |
|           | Yorkshire & Humber | 8.5%  |
|           | East Midlands      | 7.3%  |
|           | West Midlands      | 9.3%  |
|           | East               | 9.3%  |
|           | London             | 12.7% |
|           | South East         | 14.0% |
|           | South West         | 8.2%  |
|           | Wales              | 4.7%  |
|           | Scotland           | 7.8%  |
|           | Northern Ireland   | 3.1%  |

Table 2: Consumption behaviours and deprivation. The bolded values indicate significance from the model.

|                           | Consumption Behaviours |                     |                      |                     |                                    |                      |              |
|---------------------------|------------------------|---------------------|----------------------|---------------------|------------------------------------|----------------------|--------------|
|                           | Descriptive Findings   |                     |                      |                     | Logistic Regression / Significance |                      |              |
|                           | Most Deprived 20%      |                     | Least Deprived 20%   |                     | Most deprived quintile             |                      |              |
|                           | High Consumption (%)   | Low Consumption (%) | High Consumption (%) | Low Consumption (%) | OR:                                | CI (95%)             | P - value    |
| <b>Biscuits and cakes</b> | 58.4%                  | 41.6%               | 63.6%                | 36.4%               | 0.841                              | 0.638 - 1.038        | 0.097        |
| <b>Chips</b>              | 72.1%                  | 27.9%               | 67.5%                | 32.5%               | 1.259                              | 0.974 - 1.627        | 0.079        |
| <b>Confectionary</b>      | 65.3%                  | 34.7%               | 66.3%                | 33.7%               | 0.962                              | 0.751 - 1.232        | 0.759        |
| <b>Crisps</b>             | 62.8%                  | 37.2%               | 58.5%                | 41.5%               | 1.232                              | 0.965 - 1.572        | 0.093        |
| <b>Desserts</b>           | 47.1%                  | 52.9%               | 55.2%                | 44.8%               | <b>0.732</b>                       | <b>0.576 - 0.930</b> | <b>0.011</b> |
| <b>Diet Drinks</b>        | 35.7%                  | 64.3%               | 31.2%                | 68.8%               | 1.233                              | 0.959 - 1.585        | 0.102        |
| <b>Energy drinks</b>      | 15.6%                  | 84.4%               | 7.0%                 | 93.0%               | <b>2.493</b>                       | <b>1.676 - 3.706</b> | <b>0.000</b> |
| <b>Flavoured yogurts</b>  | 28.0%                  | 72.0%               | 27.3%                | 72.7%               | 1.061                              | 0.812 - 1.386        | 0.067        |
| <b>Fruit</b>              | 71.3%                  | 28.7%               | 78.8%                | 21.2%               | <b>0.668</b>                       | <b>0.507 - 0.879</b> | <b>0.004</b> |
| <b>Milk based drinks</b>  | 31.3%                  | 68.7%               | 22.6%                | 77.4%               | <b>1.613</b>                       | <b>1.229 - 2.118</b> | <b>0.001</b> |
| <b>Ready meals</b>        | 64.3%                  | 35.7%               | 56.3%                | 43.7%               | <b>1.416</b>                       | <b>1.111 - 1.712</b> | <b>0.005</b> |
| <b>Sugary drinks</b>      | 41.6%                  | 58.4%               | 27.2%                | 72.8%               | <b>1.938</b>                       | <b>1.506 - 2.494</b> | <b>0.000</b> |
| <b>Sweetened cereals</b>  | 49.6%                  | 50.4%               | 44.8%                | 55.2%               | 1.253                              | 0.986 - 1.593        | 0.066        |
| <b>Take-aways</b>         | 39.1%                  | 60.9%               | 25.1%                | 74.9%               | <b>1.914</b>                       | <b>1.482 - 2.472</b> | <b>0.000</b> |
| <b>Vegetables</b>         | 78.9%                  | 21.1%               | 92.4%                | 7.6%                | <b>0.306</b>                       | <b>0.211 - 0.442</b> | <b>0.000</b> |

**Table 3: Screen-time behaviour and deprivation. The bolded values indicate significance from the model.**

|                               | Screen Time Behaviours |                  |                |                      |                  |                |                                    |                      |              |
|-------------------------------|------------------------|------------------|----------------|----------------------|------------------|----------------|------------------------------------|----------------------|--------------|
|                               | Frequency              |                  |                |                      |                  |                | Logistic Regression / Significance |                      |              |
|                               | Most Deprived (20%)    |                  |                | Least Deprived (20%) |                  |                | Most Deprived Quintile             |                      |              |
|                               | Low Viewing %          | Medium Viewing % | High Viewing % | Low Viewing %        | Medium Viewing % | High Viewing % | OR                                 | CI                   | P-Value      |
| <b>Television Screen Time</b> | 25.7%                  | 55.9%            | 18.4%          | 31.7%                | 60.0%            | 8.3%           | <b>2.477</b>                       | <b>1.697 - 3.614</b> | <b>0.000</b> |
| <b>Streaming Screen Time</b>  | 28.2%                  | 46.8%            | 25.0%          | 33.2%                | 50.3%            | 16.5%          | <b>1.679</b>                       | <b>1.234 - 2.283</b> | <b>0.001</b> |

Table 4: Health knowledge and deprivation. The bolded values indicate significance from the model.

|                             | Overall awareness | Frequency                 |                            | Logistic Regression / Significance |                |
|-----------------------------|-------------------|---------------------------|----------------------------|------------------------------------|----------------|
|                             |                   | Most Deprived Awareness % | Least Deprived Awareness % | OR                                 | P Value        |
| <b>Cancer Link</b>          | 42.0%             | 36.1%                     | 44.4%                      | <b>0.697</b>                       | <b>[0.003]</b> |
| <b>Heart Disease Link</b>   | 87.0%             | 83.5%                     | 90.3%                      | <b>0.519</b>                       | <b>[0.000]</b> |
| <b>Stroke Link</b>          | 60.0%             | 62.1%                     | 59.2%                      | 0.862                              | [0.228]        |
| <b>Diabetes Type 1 Link</b> | 39.0%             | 46.1%                     | 36.3%                      | <b>1.536</b>                       | <b>[0.000]</b> |
| <b>Diabetes Type 2 Link</b> | 82.0%             | 78.7%                     | 84.7%                      | <b>0.64</b>                        | <b>[0.004]</b> |
| <b>Flu Link</b>             | 4.0%              | 4.1%                      | 2.7%                       | 1.544                              | [0.196]        |
| <b>Chicken Pox Link</b>     | 1.0%              | 0.4%                      | 0.7%                       | 0.558                              | [0.502]        |
| <b>Migraine Link</b>        | 14.0%             | 11.0%                     | 11.8%                      | 0.907                              | [0.604]        |

**References:**

1. National Child Measurement Programme (NCMP): Trends in child BMI. Public Health England; 2017.
2. Patterns and Trends in Child Obesity. 2018. <https://www.gov.uk/guidance/phe-data-and-analysis-tools#obesity-diet-and-physical-activity2018>.
3. Simmonds M, Llewellyn A, Owen CG, Woolacott N. Predicting adult obesity from childhood obesity: a systematic review and meta-analysis. *Obes Rev* 2016; **17**(2): 95-107.
4. Parkin DM, Boyd, L. 8. Cancers attributable to overweight and obesity in the UK in 2010. *Br J Journal of Cancer* 2011; **105 Suppl 2**: S34-7.
5. Ades PA, Savage PD. Obesity in coronary heart disease: An unaddressed behavioural risk factor. *Prev Med* 2017; **104**: 117-9
6. Brown KF, Rungay H, Dunlop C, et al. The fraction of cancer attributable to modifiable risk factors in England, Wales, Scotland, Northern Ireland, and the United Kingdom in 2015. *Br J Cancer* 2018; **118**(8): 1130-41.
7. Adult obesity and type 2 diabetes. Public Health England; 2014.
8. World Health Organisation. Global Health Risks-Mortality and burden of disease attributable to selected major risks. *The Lancet* 2015.
9. Bleich S, Cutler D, Murray C, Adams A. Why is the developed world obese? *Annu Rev Public Health* 2008; **29**: 273-95
10. Ebbeling CB, Pawlak DB, Ludwig DS. Childhood obesity: public-health crisis, common sense cure. *Lancet* 2002; **360**(9331): 473-82
11. Reilly JJ. Obesity in childhood and adolescence: evidence based clinical and public health perspectives. *Postgrad Med J* 2006; **82**(969): 429-37
12. Afshin A, Penalvo JL, Del Gobbo L, et al. The prospective impact of food pricing on improving dietary consumption: A systematic review and meta-analysis. *PLoS One* 2017; **12**(3): e0172277.
13. Vandevijvere S, Chow CC, Hall KD, Umali E, Swinburn BA. Increased food energy supply as a major driver of the obesity epidemic: a global analysis. *Bull World Health Organ* 2015; **93**(7): 446-56
14. Obesity Health Alliance. Health costs of obesity soaring as junk food companies pour millions into advertising. 2017
15. Powell L, Harris J, Fox T. Food Marketing Expenditures Aimed at Youth Putting the Numbers in Context. *American Journal of Preventative Medicine* 2014; **45**(4): 453-61.
16. Story M, French S. Food Advertising and Marketing Directed at Children and Adolescents in the US. *Int J Behav Nutr Phys Act* 2004; **1**(1): 3.
17. Thomas C, Hooper L, Petty R, Thomas F, Rosenberg G, Vohra J. 10 Years On: Cancer Research UK, 2018.
18. Thomas C, Hooper L, Petty R, Thomas F, Rosenberg G, Vohra J. Under Pressure: New evidence on young people's broadcast marketing exposure in the UK: Cancer Research UK, 2018.
19. Thomas F, Hooper L, Petty R, Thomas C, Rosenberg G, Vohra J. A Prime Time for Action: New evidence on the link between television and on-demand marketing and obesity: Cancer Research UK, 2018.
20. Boyland EJ, Nolan S, Kelly B, et al. Advertising as a cue to consume: a systematic review and meta-analysis of the effects of acute exposure to unhealthy food and nonalcoholic beverage advertising on intake in children and adults. *Am J Clin Nutr* 2016; **103**(2): 519-33.

21. Scully M, Wakefield M, Niven P, et al. Association between food marketing exposure and adolescents' food choices and eating behaviors. *Appetite* 2012; **58**(1): 1-5
22. Halford JC, Boyland EJ, Hughes G, Oliveira LP, Dovey TM. Beyond-brand effect of television (TV) food advertisements/commercials on caloric intake and food choice of 5-7-year-old children. *Appetite* 2007; **49**(1): 263-7
23. National Child Measurement Programme. Changes in children's body mass index between 2006/07 and 2015/16.: Public Health England, 2017
24. Boyland EJ, Harrold JA, Kirkham TC, Halford JC. The extent of food advertising to children on UK television in 2008. *International Journal of Pediatric Obesity* 2011; **6**(5-6): 455-61.
25. Wang Y. Cross-national comparison of childhood obesity: the epidemic and the relationship between obesity and socioeconomic status. *Int J Epidemiol* 2001; **30**(5): 1129-36.
26. England PH. Severe obesity in ten to eleven year olds reaches record high. In: Mills J, editor.: Public Health England; 2018
27. A Healthier Future - Scotland's Diet and Healthy Weight Delivery Plan. Edinburgh: Scottish Government, 2018.
28. Department of Health and Social Care: Global Public Health Directorate: Obesity FaN. Childhood Obesity: a plan for action. Chapter 2: HM Government, 2018
29. Swinburn BA. Obesity prevention: the role of policies, laws and regulations. *Aust New Zealand Health Policy* 2008; **5**: 12
30. WHO. World Health Organisation: Obesity and Overweight. 2017. <http://www.who.int/en/news-room/fact-sheets/detail/obesity-and-overweight> (accessed 24.07.18 2018).
31. Hooper L, Anderson A, Birch J, et al. Public awareness and healthcare professional advice for obesity as a risk factor for cancer in the UK: a cross-sectional survey. *Journal of Public Health* 2017.
32. Buykx P, Li J, Lovatt M, et al. An Examination of Public Attitudes Towards Alcohol Policy: University of Sheffield and Cancer Research UK, 2016
33. Bates S, Holmes J, Gavens L, et al. Awareness of alcohol as a risk factor for cancer is associated with public support for alcohol policies. *BMC Public Health* 2018; **18**(1): 688
34. Public Health England. National Diet and Nutrition Survey. 2016. <https://www.gov.uk/government/collections/national-diet-and-nutrition-survey> (accessed 03.01.18 2018)
35. Marketing IoS. Food Choice Survey: University of Stirling, 2007
36. Alcohol (Minimum Unit) Pricing Act 2012. [http://www.legislation.gov.uk/asp/2012/4/pdfs/asp\\_20120004\\_en.pdf](http://www.legislation.gov.uk/asp/2012/4/pdfs/asp_20120004_en.pdf)
37. Morley BC, Scully ML, Niven PH, et al. What factors are associated with excess body weight in Australian secondary school students? *Med J Aust* 2012; **196**(3): 189-92.
38. Department for Communities and Local Government. The English Index of Multiple Deprivation (IMD) - Guidance, 2015
39. Sugar Reduction: Achieving the 20%: Public Health England, 2017
40. Dixon HG, Scully ML, Wakefield MA, White VM, Crawford DA. The effects of television advertisements for junk food versus nutritious food on children's food attitudes and preferences. *Soc Sci Med* 2007; **65**(7): 1311-23.
41. Denny S, Lewycka S, Utter J, et al. The association between socioeconomic deprivation and secondary school students' health: findings from a latent class analysis of a national adolescent health survey. *Int J Equity Health* 2016; **15**(1): 109
42. Nestle M. Food marketing and childhood obesity--a matter of policy. *N Engl J Med* 2006; **354**(24): 2527-9.

- 1  
2  
3  
4  
5  
6  
7  
8  
9  
10  
11  
12  
13  
14  
15  
16  
17  
18  
19  
20  
21  
22  
23  
24  
25  
26  
27  
28  
29  
30  
31  
32  
33  
34  
35  
36  
37  
38  
39  
40  
41  
42  
43  
44  
45  
46  
47  
48  
49  
50  
51  
52  
53  
54  
55  
56  
57  
58  
59  
60
43. Cooke LJ, Wardle J. Age and gender differences in children's food preferences. *Br J Nutr* 2005; **93**(5): 741-6.
  44. MacGregor, A., Biquelet, A., Lepps, H., Porter, L., Eadie, D., McKell, J., MacKintosh, A A., Thomas, C., Hooper, L and Vohra, J (2016) ““It’s just there to trick you””: A qualitative study of 11-19 year olds perceptions of food and drink marketing.” ScotCen Social Research; NatCen Social Research; Institute for Social Marketing, University of Stirling; and Policy Research Centre for Cancer Prevention, Cancer Research UK.
  45. Stamatakis E, Wardle J, Cole TJ. Childhood obesity and overweight prevalence trends in England: evidence for growing socioeconomic disparities. *Int J Obes (Lond)* 2010; **34**(1): 41-7
  46. McLaren L. Socioeconomic status and obesity. *Epidemiol Rev* 2007; **29**: 29-48
  47. Bann D, Johnson W, Li L, Kuh D, Hardy R. Socioeconomic Inequalities in Body Mass Index across Adulthood: Coordinated Analyses of Individual Participant Data from Three British Birth Cohort Studies Initiated in 1946, 1958 and 1970. *PLoS Med* 2017; **14**(1): e1002214
  48. Crawford B, Byun R, Mitchell E, Thompson S, Jalaludin B, Torvaldsen S. Socioeconomic differences in the cost, availability and quality of healthy food in Sydney. *Aust N Z J Public Health* 2017; **41**(6): 567-71
  49. Campbell D. Children seeing up to 12 adverts for junk food an hour on TV, study finds. 2017. <https://www.theguardian.com/society/2017/nov/28/children-seeing-up-to-12-adverts-for-junk-food-an-hour-on-tv-study-finds> (accessed 23.07.18 2018)
  50. Bryant T. Role of knowledge in public health and health promotion policy change. *Health Promot Int* 2002; **17**(1): 89-98
  51. Raphael D and Bryant T (2006) The state’s role in promoting population health: Public health concerns in Canada, USA, UK and Sweden. *Health Policy*. 78 (1) 39 - 55

STROBE Statement—Checklist of items that should be included in reports of *cross-sectional studies*

|                              | Item No                                                                            | Recommendation                                                                                                                                                                                    | Page No. |
|------------------------------|------------------------------------------------------------------------------------|---------------------------------------------------------------------------------------------------------------------------------------------------------------------------------------------------|----------|
| <b>Title and abstract</b>    | 1                                                                                  | (a) Indicate the study's design with a commonly used term in the title or the abstract                                                                                                            | 1        |
|                              |                                                                                    | (b) Provide in the abstract an informative and balanced summary of what was done and what was found                                                                                               | 2        |
| <b>Introduction</b>          |                                                                                    |                                                                                                                                                                                                   |          |
| Background/rationale         | 2                                                                                  | Explain the scientific background and rationale for the investigation being reported                                                                                                              | 5        |
| Objectives                   | 3                                                                                  | State specific objectives, including any prespecified hypotheses                                                                                                                                  | 5        |
| <b>Methods</b>               |                                                                                    |                                                                                                                                                                                                   |          |
| Study design                 | 4                                                                                  | Present key elements of study design early in the paper                                                                                                                                           | 6        |
| Setting                      | 5                                                                                  | Describe the setting, locations, and relevant dates, including periods of recruitment, exposure, follow-up, and data collection                                                                   | 6        |
| Participants                 | 6                                                                                  | (a) Give the eligibility criteria, and the sources and methods of selection of participants                                                                                                       | 6        |
| Variables                    | 7                                                                                  | Clearly define all outcomes, exposures, predictors, potential confounders, and effect modifiers. Give diagnostic criteria, if applicable                                                          | 6        |
| Data sources/<br>measurement | 8*                                                                                 | For each variable of interest, give sources of data and details of methods of assessment (measurement). Describe comparability of assessment methods if there is more than one group              | 6        |
| Bias                         | 9                                                                                  | Describe any efforts to address potential sources of bias                                                                                                                                         | 6        |
| Study size                   | 10                                                                                 | Explain how the study size was arrived at                                                                                                                                                         | 6        |
| Quantitative variables       | 11                                                                                 | Explain how quantitative variables were handled in the analyses. If applicable, describe which groupings were chosen and why                                                                      | 6, 7     |
| Statistical methods          | 12                                                                                 | (a) Describe all statistical methods, including those used to control for confounding                                                                                                             | 6, 7     |
|                              |                                                                                    | (b) Describe any methods used to examine subgroups and interactions                                                                                                                               | 7        |
|                              | (c) Explain how missing data were addressed                                        | Not recorded for this study as online survey was used                                                                                                                                             |          |
|                              | (d) If applicable, describe analytical methods taking account of sampling strategy | 6                                                                                                                                                                                                 |          |
|                              | (e) Describe any sensitivity analyses                                              | NR                                                                                                                                                                                                |          |
| <b>Results</b>               |                                                                                    |                                                                                                                                                                                                   |          |
| Participants                 | 13*                                                                                | (a) Report numbers of individuals at each stage of study—eg numbers potentially eligible, examined for eligibility, confirmed eligible, included in the study, completing follow-up, and analysed | 8        |

|                          |     |                                                                                                                                                                                                              |                                     |
|--------------------------|-----|--------------------------------------------------------------------------------------------------------------------------------------------------------------------------------------------------------------|-------------------------------------|
|                          |     | (b) Give reasons for non-participation at each stage                                                                                                                                                         | This information was not collected. |
|                          |     | (c) Consider use of a flow diagram                                                                                                                                                                           | -                                   |
| Descriptive data         | 14* | (a) Give characteristics of study participants (eg demographic, clinical, social) and information on exposures and potential confounders                                                                     | 8, 11                               |
|                          |     | (b) Indicate number of participants with missing data for each variable of interest                                                                                                                          | 6                                   |
| Outcome data             | 15* | Report numbers of outcome events or summary measures                                                                                                                                                         | 8                                   |
| Main results             | 16  | (a) Give unadjusted estimates and, if applicable, confounder-adjusted estimates and their precision (eg, 95% confidence interval). Make clear which confounders were adjusted for and why they were included | 12,13,14                            |
|                          |     | (b) Report category boundaries when continuous variables were categorized                                                                                                                                    | 12,13,14                            |
|                          |     | (c) If relevant, consider translating estimates of relative risk into absolute risk for a meaningful time period                                                                                             | NR                                  |
| Other analyses           | 17  | Report other analyses done—eg analyses of subgroups and interactions, and sensitivity analyses                                                                                                               | NR                                  |
| <b>Discussion</b>        |     |                                                                                                                                                                                                              |                                     |
| Key results              | 18  | Summarise key results with reference to study objectives                                                                                                                                                     | 8                                   |
| Limitations              | 19  | Discuss limitations of the study, taking into account sources of potential bias or imprecision. Discuss both direction and magnitude of any potential bias                                                   | 9,10                                |
| Interpretation           | 20  | Give a cautious overall interpretation of results considering objectives, limitations, multiplicity of analyses, results from similar studies, and other relevant evidence                                   | 9,10                                |
| Generalisability         | 21  | Discuss the generalisability (external validity) of the study results                                                                                                                                        | 9,10                                |
| <b>Other information</b> |     |                                                                                                                                                                                                              |                                     |
| Funding                  | 22  | Give the source of funding and the role of the funders for the present study and, if applicable, for the original study on which the present article is based                                                | 10                                  |

\*Give information separately for exposed and unexposed groups.

**Note:** An Explanation and Elaboration article discusses each checklist item and gives methodological background and published examples of transparent reporting. The STROBE checklist is best used in conjunction with this article (freely available on the Web sites of PLoS Medicine at <http://www.plosmedicine.org/>, Annals of Internal Medicine at <http://www.annals.org/>, and Epidemiology at <http://www.epidem.com/>). Information on the STROBE Initiative is available at [www.strobe-statement.org](http://www.strobe-statement.org).

# BMJ Open

## Area deprivation, screen time and consumption of food and drink high in fat salt and sugar (HFSS) in young people: Results from a cross sectional study in the UK

|                                 |                                                                                                                                                                                                                                                                                                                                                                                                                                                                                           |
|---------------------------------|-------------------------------------------------------------------------------------------------------------------------------------------------------------------------------------------------------------------------------------------------------------------------------------------------------------------------------------------------------------------------------------------------------------------------------------------------------------------------------------------|
| Journal:                        | <i>BMJ Open</i>                                                                                                                                                                                                                                                                                                                                                                                                                                                                           |
| Manuscript ID                   | bmjopen-2018-027333.R2                                                                                                                                                                                                                                                                                                                                                                                                                                                                    |
| Article Type:                   | Research                                                                                                                                                                                                                                                                                                                                                                                                                                                                                  |
| Date Submitted by the Author:   | 02-May-2019                                                                                                                                                                                                                                                                                                                                                                                                                                                                               |
| Complete List of Authors:       | Thomas, Fiona; Cancer Research UK, Cancer Prevention<br>Thomas, Christopher; Cancer Research UK, Policy Research Centre for Cancer Prevention<br>Hooper, Lucie; Cancer Research UK, Policy Research Centre for Cancer Prevention<br>Rosenberg, Gillian; Cancer Research UK, Policy Research Centre for Cancer Prevention<br>Vohra, Jyotsna; Cancer Research UK, Cancer Prevention<br>Bauld, Linda; University of Edinburgh, Usher Institute of Population Health Sciences and Informatics |
| <b>Primary Subject Heading</b>: | Public health                                                                                                                                                                                                                                                                                                                                                                                                                                                                             |
| Secondary Subject Heading:      | Nutrition and metabolism, Health policy, Public health                                                                                                                                                                                                                                                                                                                                                                                                                                    |
| Keywords:                       | young people, inequalities, consumption, screen time, health knowledge, deprivation                                                                                                                                                                                                                                                                                                                                                                                                       |
|                                 |                                                                                                                                                                                                                                                                                                                                                                                                                                                                                           |

SCHOLARONE™  
Manuscripts

1  
2  
3 **Area deprivation, screen time and consumption of food and drink high in fat salt**  
4 **and sugar (HFSS) in young people: Results from a cross sectional study in the**  
5 **UK**  
6

7 **Fiona Thomas<sup>1</sup>, Christopher Thomas<sup>1</sup>, Lucie Hooper<sup>1</sup>, Gillian Rosenberg<sup>1</sup>, Jyotsna Vohra<sup>1</sup>**  
8 **and Linda Bauld<sup>1,2</sup>**  
9

10 <sup>1</sup>Cancer Policy Research Centre, Cancer Research UK

11 <sup>2</sup>Usher Institute, University of Edinburgh  
12

13 **Key words:** Obesity, Young people, Inequalities, Consumption, Screen time, Health Knowledge,  
14 Deprivation  
15

16 **Correspondence to:** Fiona Thomas, Cancer Research UK, Angel Building, 407 St. John Street  
17 London, EC1V 4AD  
18

19 **Contact Details:**  
20

21 Fiona Thomas – [fiona.thomas@hotmail.com](mailto:fiona.thomas@hotmail.com)

22 Christopher Thomas – [Christopher.Thomas@cancer.org.uk](mailto:Christopher.Thomas@cancer.org.uk)

23 Lucie Hooper – [Lucie.Hooper@cancer.org.uk](mailto:Lucie.Hooper@cancer.org.uk)

24 Gillian Rosenberg – [Gillian.Rosenberg@cancer.org.uk](mailto:Gillian.Rosenberg@cancer.org.uk)

25 Jyotsna Vohra – [Jyotsna.Vohra@cancer.org.uk](mailto:Jyotsna.Vohra@cancer.org.uk)

26 Linda Bauld – [Linda.Bauld@ed.ac.uk](mailto:Linda.Bauld@ed.ac.uk)  
27  
28  
29

30 **Word Count:** 3191  
31

32 **Number of Tables:** 4

33 **Number of References:** 54  
34  
35  
36  
37  
38  
39

40 **Corresponding Author:**  
41

42 Fiona Thomas

43 Cancer Policy Research Centre

44 Cancer Research UK

45 Angel Building

46 407 St. John Street

47 London

48 EC1V 4AD

49 United Kingdom

50 Tel - 020 3469 6357

51 Email - [fiona.thomas@hotmail.com](mailto:fiona.thomas@hotmail.com)  
52  
53  
54  
55  
56  
57  
58  
59  
60

## Abstract

**Objectives:** To investigate associations between deprivation in young people and consumption of foods high in fat, salt and sugar (HFSS), screen time exposure and health knowledge.

**Design:** An online cross-sectional survey with 11-19-year olds in the UK, where participants reported consumption behaviours across 13 HFSS and two non-HFSS groups; screen time for commercial television and streaming services; and knowledge of health conditions and their links to obesity.

**Setting:** United Kingdom

**Participants:** 3,348 young people aged 11-19 across the United Kingdom (UK).

**Main outcome measures:** The study assessed the consumption behaviours, commercial screen time exposure and the health knowledge of 3,348 11-19-year olds. Multivariate binary regression analysis, controlling for age and gender, was performed.

**Results:** Deprivation level was associated with increases in consumption of six of the HFSS products including energy drinks (OR:2.943 /  $P < 0.001$ ) and sugary drinks (OR:1.938,  $P < 0.001$ ), and a reduction in consumption in the two non-HFSS products included in the study; fruit (OR:0.668 /  $P = 0.004$ ) and vegetables (OR:0.306 /  $P < 0.001$ ). Deprivation was associated with high weekly screen time of both television (OR:2.477 /  $P < 0.001$ ) and streaming (OR:1.679 /  $P = 0.001$ ). Health knowledge was also associated with deprivation. There was lower awareness of the association of obesity and cancer (OR:0.697 /  $P = 0.003$ ) type 2 diabetes (OR:0.64 /  $P = 0.004$ ) and heart disease (OR:0.519 /  $P < 0.001$ ) in the most deprived.

**Conclusions:** Young people from the more deprived areas of the UK were more likely to consume of a range of HFSS products, report increased exposure to HFSS advertising and have a poorer awareness of health conditions associated with overweight and obesity. The findings suggest that population level measures addressing childhood obesity should account for consumption patterns among different groups of children and young people and the factors that may influence these.

### Strengths and limitations of this study

- The study identified an association between socio-economic deprivation and risk factors that may influence the prevalence of childhood obesity in the UK through a nationally representative sample of young people aged 11-19 across England and each of the devolved nations.
- Data collected for this study was from a single cross-sectional survey, so it is not possible to determine causation between the variables.
- The study could not directly assess exposure to marketing of foods high in fat, salt and sugar (HFSS), although previous research that had explored the relationship between commercial screen time and exposure and found the two to be related, provided us with greater confidence that screen time may be a reliable proxy for marketing exposure under current UK marketing regulations.

## BACKGROUND

In the UK, around 30% of children are overweight or obese<sup>1</sup> the highest rate of childhood obesity in Europe. This overall figure masks considerable disparities by socioeconomic status. Overweight and obesity prevalence for children in the 10% most deprived areas in England, for example, is more than double that of those who live in the least deprived 10%<sup>2</sup>. Longer term, an obese child is around five times more likely to become an obese adult<sup>3</sup>, and there is substantial evidence that obesity in adulthood directly contributes to the development of conditions such as diabetes, coronary heart disease, stroke and 13 different types of cancer<sup>4-8</sup>.

Previous studies have provided diverse explanations for the rise in levels of obesity, ranging from genetics, increased calorie intake, an increase in sedentary behaviour or a combination of factors<sup>9-11</sup>. The calorie intake increase is thought to be the most significant influence accounting for this rise, caused by a range of environmental factors<sup>9,12,13</sup>, including the role of the marketing and promotion of foods that are high in fat, salt and sugar (HFSS), often referred to as 'junk foods'. Marketing of these foods is extensive and delivered through a variety of platforms including television, streaming, price promotions and print media. Studies have identified a substantial expenditure by manufacturers and retailers on the marketing of junk food to children and young adults<sup>14,15</sup>, and identified that industry recognises the potential marketing has for influencing consumption choices<sup>16</sup>. The link between marketing and weight outcomes, as well as increased consumption of HFSS products has been highlighted by a number of previous studies<sup>17-23</sup>. Assessing exposure to HFSS marketing via self-reported recall of viewing advertisements does have limitations. Thus some studies have used commercial screen time as a proxy for TV and online marketing exposure<sup>17,21</sup>, whereby greater screen time indicates increased exposure to HFSS advertising. Prior content analysis of UK television, where young people make up a large proportion of the audience, highlighted the increased likelihood of HFSS marketing exposure<sup>24</sup>, supporting this proxy measure.

Increasingly, there is a need to identify how marketing and promotion affect children in different social groups or those living in more, or less deprived communities. Studies have previously identified an association between socioeconomic status and obesity<sup>25,26</sup>. This association is likely to be caused by a wide variety of factors including the pricing and availability of particular products in a locality<sup>27</sup>, understanding and awareness of dietary factors and weight and social norms<sup>28,29</sup>. However, further research is required to understand the inter-relationship of these factors and also other drivers of consumption including exposure to HFSS advertising. This type of research is important to identify interventions or policy actions that can contribute to addressing overweight and obesity. Halting or reversing current obesity trends is a current priority for public health policies in the UK<sup>30,31</sup>, and globally<sup>32,33</sup>.

Hooper et al<sup>34</sup>, identified that there is a low level of public awareness of the link between overweight and obesity and resulting preventable health conditions, including cancer. Only 25% of the UK adult population are aware of this link and this lack of awareness is more prevalent in less affluent groups. Other studies have also found an association between greater health awareness and increased support for policy change, particularly for alcohol policy<sup>35,36</sup>. Greater health knowledge may therefore affect how young people view the acceptability of HFSS marketing and also consumption choices.

To date, there is limited research on the association between deprivation, HFSS marketing and obesity. Given these gaps, this study aims to investigate whether such a relationship exists and how it might be influenced by particular mediators such as frequency and duration of exposure to marketing and knowledge and understanding of health risks.

## METHODS

### Study design

An online cross-sectional survey was conducted between April and June 2017. The survey was developed following cognitive testing with a small sample of young people (n=100) to ensure age and cultural comprehensibility of the questions, some of which were based on well validated questions used in other surveys<sup>21, 37-40</sup>. The final survey covered six main themes; exercise levels; food and drink consumption, screen time, recalled marketing exposure, perceptions of marketing and demographic factors.

A total of 3,348 young people, aged 11-19 were recruited by market research company, YouGov, using their in-house panel. YouGov already had data on the children in households of adult in-house panel members. Children over the age of 16 were directly approached and asked if they wished to participate. For those aged under 16, their parents were contacted and asked if their child could participate in the survey. Data collected was weighted by age, gender, ethnicity, region and social grade to be representative of the UK population.

### Measures

#### Deprivation

Level of deprivation was assessed using an area-based measure rather than individual measure of socio-economic status. The Index of Multiple Deprivation (IMD) was coded into five equal quintiles for analysis, ranging from (1) the lowest 20% of deprivation to (5) the highest 20% of respondents. IMD is a measure of the relative deprivation of an area, combining information from seven domains; income deprivation, employment deprivation, education, skills and training deprivation, health deprivation and disability, crime, barriers to housing and services and living environment deprivation<sup>41</sup>.

#### Consumption Behaviours

The survey measured consumption of a range of food and drink products. Participants were asked to report their consumption behaviours from the question 'How often do you usually eat or drink...?' followed by a series of food categories high in fat, salt and sugar including biscuits and cakes, chips, confectionary, crisps, desserts, energy drinks, flavoured yogurts, milk-based drinks, ready meals, sugary drinks, sweetened cereal and take-aways, as well as with healthy items such as fruit and vegetables. These food groups were chosen using previous research on unhealthy products and with reference to the categories included by Public Health England in their sugar reduction programme<sup>42</sup>. Responses were graded on a Likert scale from more than once a day to never, and then converted to binary variables across two coding groups. The groups identified as 'higher' consumption depending on the total calorific content in each food<sup>17, 21, 42</sup>. The first coding group included sugar sweetened drinks, flavoured yoghurts, confectionary, cakes/biscuits, fruit, vegetables, diet drinks, crisps and desserts where two or more portions a week was considered high consumption<sup>42</sup>. The second coding group included takeaways, ready meals, energy drinks, fried potato products, milk-based drinks and sugar sweetened cereals where one or more portions a week was considered higher consumption<sup>42</sup>. The coding was only calculated for participants who gave an answer, and those who selected 'not sure' were excluded from the final analysis.

#### Screen Time

Commercial screen time was a variable created in the data set based on responses related to frequency and duration of exposure to TV and streaming (on demand) services<sup>21, 43</sup>. Participants listed the hours

1  
2  
3 spent watching both commercial and non-commercial TV and streaming services. This excluded  
4 screen time from computers being used for homework. Non-commercial screen time (which contains  
5 no paid for marketing in the UK context) was shown to not be significant in previous analysis of the  
6 data<sup>17-19</sup> and was therefore removed. Weekend and week-day viewing was then weighted and turned  
7 into a weekly measure and categorised; low (<3 hours per week), medium (3 – 21 hours per week)  
8 and high (21 hours or more per week)<sup>21</sup>.

### 10 Health Knowledge

11  
12 Health knowledge was assessed using the question ‘Which, if any, of the following health conditions  
13 do you think can result from being overweight? Please tick all that apply.’ Options included answers  
14 that were both correct and incorrect to identify the extent of health knowledge. The eight chosen  
15 conditions were; cancer, stroke, heart disease, diabetes type 1, diabetes type 2, migraines, chicken pox  
16 and flu. From this, the results were coded as a binary variable: 0 – unaware; 1 – aware of the links  
17 between certain conditions and being overweight.

### 20 Age and gender

21 Control variables were selected on theoretical importance from a rapid review of the literature<sup>21, 40, 43-46</sup>  
22 and included gender (coded 0 – Male, 1 – Female) and age (11-19 years).

### 25 Patient and Public Involvement

26 Prior to the development of the survey qualitative research was carried out by colleagues at the  
27 University of Stirling and National Centre for Social Research. This work consulted young people  
28 through focus groups, on the design and design and content of the questionnaire. Results of these  
29 focus group discussions were published in a Cancer Research UK report “*It’s Just There To Trick*  
30 *You*”<sup>47</sup>. This PPI development work involved discussion of relevant research questions related to food  
31 and beverage consumption, relevant policy issues (i.e. exposure to food marketing, pricing,  
32 availability), use of broadcast media examples and the appropriateness of questions relating to socio-  
33 demographic characteristics. Questions included in the resulting survey were then trialled with young  
34 people using cognitive interviewing techniques as described above. Survey reports are publicly  
35 available on Cancer Policy Research Centre’s website.

### 39 ETHICS

40 Ethical approval was obtained in January 2017 from the General University Ethics Panel (GUEP) at  
41 the University of Stirling (GUEP59). This ethical approval covered both cognitive testing of the  
42 questionnaires and the online surveys. YouGov’s staff included lead for ethical and quality assurance,  
43 to ensure adherence to best practice throughout testing and data collection. This included ensuring  
44 informed consent was obtained from participants, links were provided to relevant support  
45 organisations should participants wish to contact them and confidentiality of personal information was  
46 assured.

### 49 ANALYSIS

50  
51 Data were analysed using IBM SPSS Version 23. Multiple multivariate binary regression models  
52 were run on the unweighted data to test for associations between deprivation levels and three key  
53 behaviours of young people; consumption behaviours, screen time use and health knowledge. The  
54 consumption model used the dependent binary variables of food and drink consumption behaviours.  
55 Models were run separately for each dependent variable, producing 15 models in total. The screen  
56 time model used the dependent variable of categorised reported screen time hours. The health  
57 knowledge model used the dependent binary variable of awareness of a health condition and its link to  
58  
59  
60

1  
2  
3 overweight and obesity. This included eight different health conditions, some with identified  
4 associations, and some without.  
5

6 Within each of these models the Index of Multiple Deprivation (IMD) variable was used as an  
7 independent variable, with the least deprived quintile as the reference group. Age and gender were  
8 included in the models as control variables, as potentially confounding variables.  
9

## 10 RESULTS

### 11 Sample characteristics

12 Almost half (49%) of the survey respondents were female and 51% male. The mean age of  
13 participants was 14.9 years old (SD = 2.55). The majority (82%) were from white British backgrounds  
14 with 18% from other ethnic groups. The majority of respondents lived in England (82%); 5% of  
15 respondents lived in Wales, 8% in Scotland and 3% in Northern Ireland (*Table 1*).  
16  
17  
18

### 19 Screen time

20 Of respondents, there were 31.9% in low, 57.1% in medium and 11.0% in high screen time category  
21 for television viewing. For streaming services there was 30.3% in low, 50.7% in medium and 19.0%  
22 in high screen time categories.  
23  
24

### 25 Deprivation and Consumption Behaviours

26 The results of the binary logistic regressions showed an association between deprivation and higher  
27 consumption behaviours, for a range of HFSS food products (*Table 2*). The most deprived young  
28 people were significantly more likely to consume energy drinks (OR= 2.943,  $P < 0.001$ ), followed by  
29 sugary drinks (OR= 1.938,  $P < 0.001$ ).  
30  
31

32 In contrast, analysis identified consumption of fruit and vegetables was inversely associated with  
33 more deprived groups. Fruit (OR= 0.668,  $P = 0.004$ ) and vegetables (OR= 0.306,  $P < 0.001$ ) were  
34 more likely to be consumed in lower frequency by the most deprived respondents, when compared to  
35 the most affluent respondents, as per the use of IMD. Therefore, these young people had a reduced  
36 likelihood of consuming the healthier options in higher quantities.  
37  
38

### 39 Deprivation and Screen Time

40 Regression analysis found an association between deprivation in young people and high weekly  
41 screen time of both television and streaming (*Table 3*). The model compared 'high' category screen  
42 time (21 hours or more a week) to 'medium and low' screen time (less than 21 hours a week) and  
43 found those from the most deprived quintile were significantly more likely to be in the high screen  
44 time category than the more affluent respondents, for both television (OR= 2.477,  $P < 0.001$ ) and  
45 streaming (OR= 1.679,  $P = 0.001$ ).  
46  
47

### 48 Deprivation and Health Knowledge

49 The analysis identified an association between deprivation and poorer health knowledge (*Table 4*).  
50 Respondents were asked whether eight health conditions (from a pre-existing list) could occur as a  
51 result of being overweight or obese. There was significantly poorer awareness of the association  
52 between cancer (OR= 0.697,  $P = 0.003$ ), type 2 diabetes (OR= 0.64,  $P = 0.004$ ) and heart disease  
53 (OR= 0.519,  $P < 0.001$ ) and obesity for those from the more deprived quintiles. There was also  
54 significantly higher association between incorrectly linking type 1 diabetes (OR= 1.536,  $P < 0.001$ )  
55 and obesity in the most deprived quintile, compared to the most affluent quintile.  
56  
57  
58  
59  
60

## DISCUSSION

Results from this survey identify a clear association between socio-economic deprivation and risk factors that may influence the prevalence of childhood obesity in the UK. Involving a nationally representative sample of young people aged 11-19 across England and each of the devolved nations, it sought to explore whether young people living in more deprived areas reported knowledge and behaviours that may contribute to obesity. The study found that these young people consumed more foods and beverages high in salt sugar and fat, and were conversely less likely to report consumption of fruit and vegetables. In addition, young people living in more deprived communities spent more time watching commercial broadcast media where they could be exposed to HFSS advertising. Young people living in less affluent areas also had lower levels of awareness of the preventable health conditions, including cancer, which can arise as a result of obesity.

These results support findings from previous studies on factors influencing childhood obesity but also provide new evidence on the clustering of these factors amongst less affluent groups. It is well established that there is a clear gradient in overweight and obesity by socio-economic status in both adults and young people, with individuals from less affluent communities more likely to carry excess weight compared to their more affluent neighbours<sup>2, 25, 26, 48-50</sup>. More limited research has explored how eating patterns vary by deprivation in young people. This study adds to existing evidence suggesting that greater HFSS consumption and lower levels of fruit and vegetable consumption are more common in less affluent young people<sup>18, 51</sup>.

This survey also asked young people about the time they spend watching television and on-demand screening services and calculated 'screen time' using an approach employed in previous studies<sup>17, 21</sup>. While higher levels of screen time are associated with sedentary behaviour, which may contribute to obesity, they may also suggest greater exposure to broadcast media marketing including of HFSS foods. Previous research has found that children who spent more time watching commercial TV and on demand programmes in the UK are exposed to more HFSS food marketing than those with lower levels of screen time<sup>24, 52</sup>. Viewing more HFSS ads on TV and streaming has been associated with higher HFSS consumption, with the difference between a high consumer and a low consumer being at least 520 junk food products a year<sup>17</sup>.

We also found that young people living in more deprived areas had lower levels of awareness of the links between overweight and obesity and relevant health conditions. Awareness is relevant because evidence relating to other preventable risk factors (such as smoking and alcohol) suggest that health knowledge is relevant as a preliminary step towards changing behaviour, but also, importantly, understanding and support for policies and interventions that may address key factors that drive consumption including restrictions on marketing and pricing of unhealthy products<sup>35, 36, 53, 54</sup>.

Taken together our findings suggest that inequalities in rates of obesity in young people in the UK may be linked to knowledge and behaviours driven by key aspects of an obesogenic environment. Action to address childhood obesity needs to take into account differential consumption patterns amongst less affluent young people and the factors that may influence these consumption patterns. The introduction of policies and interventions that aim to address these factors, including better information on the health consequences of obesity, reducing exposure to HFSS marketing and other wider population level measures (such as policies to address the price and content of products) should consider and assess their impact on less affluent groups.

### Strengths and limitations of the study

This study has a number of limitations. Data are from a single cross-sectional survey, so it is not possible to determine causation. The measure of deprivation used was an areas-based measure (IMD) which has limitations, as individual or household deprivation may vary within areas. Young people may have limited knowledge and awareness of different health conditions, for example the distinction

1  
2  
3 between Type 1 and Type II diabetes and therefore responses to the question relating to health  
4 conditions may in part reflect this lack of understanding. Responses to each of the key topics of  
5 interest including food consumption patterns, use of streaming services and TV viewing, and  
6 awareness of health conditions linked to obesity were based on self-report and thus subject to mis-  
7 reporting or recall bias. The study could not directly assess exposure to HFSS marketing, although our  
8 previous research has explored the relationship between commercial screen time and exposure and  
9 found the two to be related<sup>17, 21</sup>, which provides us with greater confidence that screen time may be a  
10 reliable proxy for marketing exposure under current UK marketing regulations. The response rate for  
11 this survey is estimated at 26% for 16-19 year olds and 47% for 11-15 year olds with the parental  
12 consent process. This is in line with what is usually obtained for surveys with young people by  
13 YouGov and is a limitation when sampling from this population demographic. Finally, overweight  
14 and obesity in young people is driven by a wide range of factors beyond those assessed in this study.  
15  
16

### 17 **Conclusions and future research**

18  
19 Taken together our findings suggest that inequalities in rates of obesity in young people in the UK  
20 may be linked to knowledge and behaviours driven by key aspects of an obesogenic environment.  
21 Action to address childhood obesity needs to take into account differential consumption patterns  
22 amongst less affluent young people and the factors that may influence these consumption patterns.  
23 The introduction of policies and interventions that aim to address these factors, including better  
24 information on the health consequences of obesity, reducing exposure to HFSS marketing and other  
25 wider population level measures (such as policies to address the price and content of products) should  
26 consider and assess their impact on less affluent groups.  
27  
28

29 Future research should explore in more detail a larger number of factors, including, for example, the  
30 affordability and availability of HFSS foods, social norms and the influence of social networks in  
31 more deprived communities and how these influence knowledge and behaviour among more deprived  
32 young people. In addition, studies should assess the impact of changes to the policy and regulatory  
33 environment proposed in the UK and other countries to reduce childhood obesity and how these  
34 changes may affect young people living in communities where obesity rates are highest.  
35  
36  
37

### 38 **FUNDING AND ACKNOWLEDGEMENTS**

39  
40 We are grateful to the Cancer Policy Research Centre, Cancer Research UK for funding the study.  
41 The views expressed are those of the researchers and not necessarily those of the funder.  
42

### 43 **CONTRIBUTORSHIP STATEMENT**

44  
45 Fiona Thomas carried out the majority of the analysis for this publication along with Chris Thomas  
46 and Lucie Hooper who also developed the questions for the survey. Gillian Rosenberg contributed to  
47 the preparation of the manuscript and analysis plan. Both Jyotsna Vohra and Linda Bauld contributed  
48 to the study design and concept and the preparation of the manuscript.  
49

### 50 **COMPETING INTERESTS**

51  
52 None  
53

### 54 **DATA SHARING AGREEMENT**

55  
56 Data can be made available on request to the Cancer Policy Research Centre (CRUK). Please contact  
57 CPRC@cancer.org.uk  
58  
59  
60

**Table 1: Sample Demographics of the UK Representative respondents**

|           |                    |       |
|-----------|--------------------|-------|
| Male      | 11 to 12           | 11.0% |
|           | 13 to 15           | 16.0% |
|           | 16 to 17           | 12.0% |
|           | 18 to 19           | 12.0% |
| Female    | 11 to 12           | 10.0% |
|           | 13 to 15           | 16.0% |
|           | 16 to 17           | 11.0% |
|           | 18 to 19           | 12.0% |
| Ethnicity | White              | 82.0% |
|           | BME                | 18.0% |
| IMD       | 1,2                | 20.0% |
|           | 3,4                | 20.0% |
|           | 5,6                | 20.0% |
|           | 7,8                | 20.0% |
|           | 9,10               | 20.0% |
| Region    | North East         | 4.0%  |
|           | North West         | 11.1% |
|           | Yorkshire & Humber | 8.5%  |
|           | East Midlands      | 7.3%  |
|           | West Midlands      | 9.3%  |
|           | East               | 9.3%  |
|           | London             | 12.7% |
|           | South East         | 14.0% |
|           | South West         | 8.2%  |
|           | Wales              | 4.7%  |
|           | Scotland           | 7.8%  |
|           | Northern Ireland   | 3.1%  |

Table 2: Consumption behaviours and deprivation. The bolded values indicate significance from the model.

|                           | Consumption Behaviours |                     |                      |                     |                                    |                      |              |
|---------------------------|------------------------|---------------------|----------------------|---------------------|------------------------------------|----------------------|--------------|
|                           | Descriptive Findings   |                     |                      |                     | Logistic Regression / Significance |                      |              |
|                           | Most Deprived 20%      |                     | Least Deprived 20%   |                     | Most deprived quintile             |                      |              |
|                           | High Consumption (%)   | Low Consumption (%) | High Consumption (%) | Low Consumption (%) | OR:                                | CI (95%)             | P - value    |
| <b>Biscuits and cakes</b> | 58.4%                  | 41.6%               | 63.6%                | 36.4%               | 0.841                              | 0.638 - 1.038        | 0.097        |
| <b>Chips</b>              | 72.1%                  | 27.9%               | 67.5%                | 32.5%               | 1.259                              | 0.974 - 1.627        | 0.079        |
| <b>Confectionary</b>      | 65.3%                  | 34.7%               | 66.3%                | 33.7%               | 0.962                              | 0.751 - 1.232        | 0.759        |
| <b>Crisps</b>             | 62.8%                  | 37.2%               | 58.5%                | 41.5%               | 1.232                              | 0.965 - 1.572        | 0.093        |
| <b>Desserts</b>           | 47.1%                  | 52.9%               | 55.2%                | 44.8%               | <b>0.732</b>                       | <b>0.576 - 0.930</b> | <b>0.011</b> |
| <b>Diet Drinks</b>        | 35.7%                  | 64.3%               | 31.2%                | 68.8%               | 1.233                              | 0.959 - 1.585        | 0.102        |
| <b>Energy drinks</b>      | 15.6%                  | 84.4%               | 7.0%                 | 93.0%               | <b>2.493</b>                       | <b>1.676 - 3.706</b> | <b>0.000</b> |
| <b>Flavoured yogurts</b>  | 28.0%                  | 72.0%               | 27.3%                | 72.7%               | 1.061                              | 0.812 - 1.386        | 0.067        |
| <b>Fruit</b>              | 71.3%                  | 28.7%               | 78.8%                | 21.2%               | <b>0.668</b>                       | <b>0.507 - 0.879</b> | <b>0.004</b> |
| <b>Milk based drinks</b>  | 31.3%                  | 68.7%               | 22.6%                | 77.4%               | <b>1.613</b>                       | <b>1.229 - 2.118</b> | <b>0.001</b> |
| <b>Ready meals</b>        | 64.3%                  | 35.7%               | 56.3%                | 43.7%               | <b>1.416</b>                       | <b>1.111 - 1.712</b> | <b>0.005</b> |
| <b>Sugary drinks</b>      | 41.6%                  | 58.4%               | 27.2%                | 72.8%               | <b>1.938</b>                       | <b>1.506 - 2.494</b> | <b>0.000</b> |
| <b>Sweetened cereals</b>  | 49.6%                  | 50.4%               | 44.8%                | 55.2%               | 1.253                              | 0.986 - 1.593        | 0.066        |
| <b>Take-aways</b>         | 39.1%                  | 60.9%               | 25.1%                | 74.9%               | <b>1.914</b>                       | <b>1.482 - 2.472</b> | <b>0.000</b> |
| <b>Vegetables</b>         | 78.9%                  | 21.1%               | 92.4%                | 7.6%                | <b>0.306</b>                       | <b>0.211 - 0.442</b> | <b>0.000</b> |

**Table 3: Screen-time behaviour and deprivation. The bolded values indicate significance from the model.**

|                               | Screen Time Behaviours |                  |                |                      |                  |                |                                    |                      |              |
|-------------------------------|------------------------|------------------|----------------|----------------------|------------------|----------------|------------------------------------|----------------------|--------------|
|                               | Frequency              |                  |                |                      |                  |                | Logistic Regression / Significance |                      |              |
|                               | Most Deprived (20%)    |                  |                | Least Deprived (20%) |                  |                | Most Deprived Quintile             |                      |              |
|                               | Low Viewing %          | Medium Viewing % | High Viewing % | Low Viewing %        | Medium Viewing % | High Viewing % | OR                                 | CI                   | P-Value      |
| <b>Television Screen Time</b> | 25.7%                  | 55.9%            | 18.4%          | 31.7%                | 60.0%            | 8.3%           | <b>2.477</b>                       | <b>1.697 - 3.614</b> | <b>0.000</b> |
| <b>Streaming Screen Time</b>  | 28.2%                  | 46.8%            | 25.0%          | 33.2%                | 50.3%            | 16.5%          | <b>1.679</b>                       | <b>1.234 - 2.283</b> | <b>0.001</b> |

Table 4: Health knowledge and deprivation. The bolded values indicate significance from the model.

|                             | Overall awareness | Frequency                 |                            | Logistic Regression / Significance |                |
|-----------------------------|-------------------|---------------------------|----------------------------|------------------------------------|----------------|
|                             |                   | Most Deprived Awareness % | Least Deprived Awareness % | OR                                 | P Value        |
| <b>Cancer Link</b>          | 42.0%             | 36.1%                     | 44.4%                      | <b>0.697</b>                       | <b>[0.003]</b> |
| <b>Heart Disease Link</b>   | 87.0%             | 83.5%                     | 90.3%                      | <b>0.519</b>                       | <b>[0.000]</b> |
| <b>Stroke Link</b>          | 60.0%             | 62.1%                     | 59.2%                      | 0.862                              | [0.228]        |
| <b>Diabetes Type 1 Link</b> | 39.0%             | 46.1%                     | 36.3%                      | <b>1.536</b>                       | <b>[0.000]</b> |
| <b>Diabetes Type 2 Link</b> | 82.0%             | 78.7%                     | 84.7%                      | <b>0.64</b>                        | <b>[0.004]</b> |
| <b>Flu Link</b>             | 4.0%              | 4.1%                      | 2.7%                       | 1.544                              | [0.196]        |
| <b>Chicken Pox Link</b>     | 1.0%              | 0.4%                      | 0.7%                       | 0.558                              | [0.502]        |
| <b>Migraine Link</b>        | 14.0%             | 11.0%                     | 11.8%                      | 0.907                              | [0.604]        |

**References:**

1. National Child Measurement Programme (NCMP): Trends in child BMI. Public Health England; 2017.
2. Patterns and Trends in Child Obesity. 2018. <https://www.gov.uk/guidance/phe-data-and-analysis-tools#obesity-diet-and-physical-activity2018>.
3. Simmonds M, Llewellyn A, Owen CG, Woolacott N. Predicting adult obesity from childhood obesity: a systematic review and meta-analysis. *Obes Rev* 2016; **17**(2): 95-107.
4. Parkin DM, Boyd, L. 8. Cancers attributable to overweight and obesity in the UK in 2010. *Br J Journal of Cancer* 2011; **105 Suppl 2**: S34-7.
5. Ades PA, Savage PD. Obesity in coronary heart disease: An unaddressed behavioural risk factor. *Prev Med* 2017; **104**: 117-9
6. Brown KF, Rungay H, Dunlop C, et al. The fraction of cancer attributable to modifiable risk factors in England, Wales, Scotland, Northern Ireland, and the United Kingdom in 2015. *Br J Cancer* 2018; **118**(8): 1130-41.
7. Adult obesity and type 2 diabetes. Public Health England; 2014.
8. World Health Organisation. Global Health Risks-Mortality and burden of disease attributable to selected major risks. *The Lancet* 2015.
9. Bleich S, Cutler D, Murray C, Adams A. Why is the developed world obese? *Annu Rev Public Health* 2008; **29**: 273-95
10. Ebbeling CB, Pawlak DB, Ludwig DS. Childhood obesity: public-health crisis, common sense cure. *Lancet* 2002; **360**(9331): 473-82
11. Reilly JJ. Obesity in childhood and adolescence: evidence based clinical and public health perspectives. *Postgrad Med J* 2006; **82**(969): 429-37
12. Afshin A, Penalvo JL, Del Gobbo L, et al. The prospective impact of food pricing on improving dietary consumption: A systematic review and meta-analysis. *PLoS One* 2017; **12**(3): e0172277.
13. Vandevijvere S, Chow CC, Hall KD, Umali E, Swinburn BA. Increased food energy supply as a major driver of the obesity epidemic: a global analysis. *Bull World Health Organ* 2015; **93**(7): 446-56
14. Obesity Health Alliance. Health costs of obesity soaring as junk food companies pour millions into advertising. 2017
15. Powell L, Harris J, Fox T. Food Marketing Expenditures Aimed at Youth Putting the Numbers in Context. *American Journal of Preventative Medicine* 2014; **45**(4): 453-61.
16. Story M, French S. Food Advertising and Marketing Directed at Children and Adolescents in the US. *Int J Behav Nutr Phys Act* 2004; **1**(1): 3.
17. Thomas C, Hooper L, Petty R, Thomas F, Rosenberg G, Vohra J. 10 Years On: Cancer Research UK, 2018.
18. Thomas C, Hooper L, Petty R, Thomas F, Rosenberg G, Vohra J. Under Pressure: New evidence on young people's broadcast marketing exposure in the UK: Cancer Research UK, 2018.
19. Thomas F, Hooper L, Petty R, Thomas C, Rosenberg G, Vohra J. A Prime Time for Action: New evidence on the link between television and on-demand marketing and obesity: Cancer Research UK, 2018.
20. Boyland EJ, Nolan S, Kelly B, et al. Advertising as a cue to consume: a systematic review and meta-analysis of the effects of acute exposure to unhealthy food and nonalcoholic beverage advertising on intake in children and adults. *Am J Clin Nutr* 2016; **103**(2): 519-33.

21. Scully M, Wakefield M, Niven P, et al. Association between food marketing exposure and adolescents' food choices and eating behaviors. *Appetite* 2012; **58**(1): 1-5
22. Halford JC, Boyland EJ, Hughes G, Oliveira LP, Dovey TM. Beyond-brand effect of television (TV) food advertisements/commercials on caloric intake and food choice of 5-7-year-old children. *Appetite* 2007; **49**(1): 263-7
23. National Child Measurement Programme. Changes in children's body mass index between 2006/07 and 2015/16.: Public Health England, 2017
24. Boyland EJ, Harrold JA, Kirkham TC, Halford JC. The extent of food advertising to children on UK television in 2008. *International Journal of Pediatric Obesity* 2011; **6**(5-6): 455-61.
25. Wang Y. Cross-national comparison of childhood obesity: the epidemic and the relationship between obesity and socioeconomic status. *Int J Epidemiol* 2001; **30**(5): 1129-36.
26. Public Health England. Severe obesity in ten to eleven year olds reaches record high. In: Mills J, editor.: Public Health England; 2018
27. Wilsher, S. H., Harrison, F., Yamoah, F., Fearne, A., & Jones, A. (2016). The relationship between unhealthy food sales, socio-economic deprivation and childhood weight status: results of a cross-sectional study in England. *International Journal of Behavioral Nutrition and Physical Activity*, *13*(1), 21.
28. Sanderson, S. C., Waller, J., Jarvis, M. J., Humphries, S. E., & Wardle, J. (2009). Awareness of lifestyle risk factors for cancer and heart disease among adults in the UK. *Patient education and counseling*, *74*(2), 221-227.
29. Puhl, R., & Suh, Y. (2015). Health consequences of weight stigma: implications for obesity prevention and treatment. *Current obesity reports*, *4*(2), 182-190.
30. A Healthier Future - Scotland's Diet and Healthy Weight Delivery Plan. Edinburgh: Scottish Government, 2018.
31. Department of Health and Social Care: Global Public Health Directorate: Obesity FaN. Childhood Obesity: a plan for action. Chapter 2: HM Government, 2018
32. Swinburn BA. Obesity prevention: the role of policies, laws and regulations. *Aust New Zealand Health Policy* 2008; **5**: 12
33. WHO. World Health Organisation: Obesity and Overweight. 2017.  
<http://www.who.int/en/news-room/fact-sheets/detail/obesity-and-overweight> (accessed 24.07.18 2018).
34. Hooper L, Anderson A, Birch J, et al. Public awareness and healthcare professional advice for obesity as a risk factor for cancer in the UK: a cross-sectional survey. *Journal of Public Health* 2017.
35. Buykx P, Li J, Lovatt M, et al. An Examination of Public Attitudes Towards Alcohol Policy: University of Sheffield and Cancer Research UK, 2016
36. Bates S, Holmes J, Gavens L, et al. Awareness of alcohol as a risk factor for cancer is associated with public support for alcohol policies. *BMC Public Health* 2018; **18**(1): 688
37. Public Health England. National Diet and Nutrition Survey. 2016.  
<https://www.gov.uk/government/collections/national-diet-and-nutrition-survey> (accessed 03.01.18 2018)
38. Marketing IoS. Food Choice Survey: University of Stirling, 2007
39. Alcohol (Minimum Unit) Pricing Act 2012.  
[http://www.legislation.gov.uk/asp/2012/4/pdfs/asp\\_20120004\\_en.pdf](http://www.legislation.gov.uk/asp/2012/4/pdfs/asp_20120004_en.pdf)
40. Morley BC, Scully ML, Niven PH, et al. What factors are associated with excess body weight in Australian secondary school students? *Med J Aust* 2012; **196**(3): 189-92.
41. Department for Communities and Local Government. The English Index of Multiple Deprivation (IMD) - Guidance, 2015

- 1  
2  
3  
4  
5  
6  
7  
8  
9  
10  
11  
12  
13  
14  
15  
16  
17  
18  
19  
20  
21  
22  
23  
24  
25  
26  
27  
28  
29  
30  
31  
32  
33  
34  
35  
36  
37  
38  
39  
40  
41  
42  
43  
44  
45  
46  
47  
48  
49  
50  
51  
52  
53  
54  
55  
56  
57  
58  
59  
60
42. Sugar Reduction: Achieving the 20%: Public Health England, 2017
  43. Dixon HG, Scully ML, Wakefield MA, White VM, Crawford DA. The effects of television advertisements for junk food versus nutritious food on children's food attitudes and preferences. *Soc Sci Med* 2007; **65**(7): 1311-23.
  44. Denny S, Lewycka S, Utter J, et al. The association between socioeconomic deprivation and secondary school students' health: findings from a latent class analysis of a national adolescent health survey. *Int J Equity Health* 2016; **15**(1): 109
  45. Nestle M. Food marketing and childhood obesity--a matter of policy. *N Engl J Med* 2006; **354**(24): 2527-9.
  46. Cooke LJ, Wardle J. Age and gender differences in children's food preferences. *Br J Nutr* 2005; **93**(5): 741-6.
  47. MacGregor, A., Bicquelet, A., Lepps, H., Porter, L., Eadie, D., McKell, J., MacKintosh, A A., Thomas, C., Hooper, L and Vohra, J (2016) ““It’s just there to trick you””: A qualitative study of 11-19 year olds perceptions of food and drink marketing.” ScotCen Social Research; NatCen Social Research; Institute for Social Marketing, University of Stirling; and Policy Research Centre for Cancer Prevention, Cancer Research UK.
  48. Stamatakis E, Wardle J, Cole TJ. Childhood obesity and overweight prevalence trends in England: evidence for growing socioeconomic disparities. *Int J Obes (Lond)* 2010; **34**(1): 41-7
  49. McLaren L. Socioeconomic status and obesity. *Epidemiol Rev* 2007; **29**: 29-48
  50. Bann D, Johnson W, Li L, Kuh D, Hardy R. Socioeconomic Inequalities in Body Mass Index across Adulthood: Coordinated Analyses of Individual Participant Data from Three British Birth Cohort Studies Initiated in 1946, 1958 and 1970. *PLoS Med* 2017; **14**(1): e1002214
  51. Crawford B, Byun R, Mitchell E, Thompson S, Jalaludin B, Torvaldsen S. Socioeconomic differences in the cost, availability and quality of healthy food in Sydney. *Aust N Z J Public Health* 2017; **41**(6): 567-71
  52. Campbell D. Children seeing up to 12 adverts for junk food an hour on TV, study finds. 2017. <https://www.theguardian.com/society/2017/nov/28/children-seeing-up-to-12-adverts-for-junk-food-an-hour-on-tv-study-finds> (accessed 23.07.18 2018)
  53. Bryant T. Role of knowledge in public health and health promotion policy change. *Health Promot Int* 2002; **17**(1): 89-98
  54. Raphael D and Bryant T (2006) The state’s role in promoting population health: Public health concerns in Canada, USA, UK and Sweden. *Health Policy*. 78 (1) 39 - 55

1  
2  
3  
4  
5  
6  
7  
8  
9  
10  
11  
12  
13  
14  
15  
16  
17  
18  
19  
20  
21  
22  
23  
24  
25  
26  
27  
28  
29  
30  
31  
32  
33  
34  
35  
36  
37  
38  
39  
40  
41  
42  
43  
44  
45  
46  
47  
48  
49  
50  
51  
52  
53  
54  
55  
56  
57  
58  
59  
60STROBE Statement—Checklist of items that should be included in reports of *cross-sectional studies*

|                              | Item No                                                                            | Recommendation                                                                                                                                                                                    | Page No. |
|------------------------------|------------------------------------------------------------------------------------|---------------------------------------------------------------------------------------------------------------------------------------------------------------------------------------------------|----------|
| <b>Title and abstract</b>    | 1                                                                                  | (a) Indicate the study's design with a commonly used term in the title or the abstract                                                                                                            | 1        |
|                              |                                                                                    | (b) Provide in the abstract an informative and balanced summary of what was done and what was found                                                                                               | 2        |
| <b>Introduction</b>          |                                                                                    |                                                                                                                                                                                                   |          |
| Background/rationale         | 2                                                                                  | Explain the scientific background and rationale for the investigation being reported                                                                                                              | 5        |
| Objectives                   | 3                                                                                  | State specific objectives, including any prespecified hypotheses                                                                                                                                  | 5        |
| <b>Methods</b>               |                                                                                    |                                                                                                                                                                                                   |          |
| Study design                 | 4                                                                                  | Present key elements of study design early in the paper                                                                                                                                           | 6        |
| Setting                      | 5                                                                                  | Describe the setting, locations, and relevant dates, including periods of recruitment, exposure, follow-up, and data collection                                                                   | 6        |
| Participants                 | 6                                                                                  | (a) Give the eligibility criteria, and the sources and methods of selection of participants                                                                                                       | 6        |
| Variables                    | 7                                                                                  | Clearly define all outcomes, exposures, predictors, potential confounders, and effect modifiers. Give diagnostic criteria, if applicable                                                          | 6        |
| Data sources/<br>measurement | 8*                                                                                 | For each variable of interest, give sources of data and details of methods of assessment (measurement). Describe comparability of assessment methods if there is more than one group              | 6        |
| Bias                         | 9                                                                                  | Describe any efforts to address potential sources of bias                                                                                                                                         | 6        |
| Study size                   | 10                                                                                 | Explain how the study size was arrived at                                                                                                                                                         | 6        |
| Quantitative variables       | 11                                                                                 | Explain how quantitative variables were handled in the analyses. If applicable, describe which groupings were chosen and why                                                                      | 6, 7     |
| Statistical methods          | 12                                                                                 | (a) Describe all statistical methods, including those used to control for confounding                                                                                                             | 6, 7     |
|                              |                                                                                    | (b) Describe any methods used to examine subgroups and interactions                                                                                                                               | 7        |
|                              | (c) Explain how missing data were addressed                                        | Not recorded for this study as online survey was used                                                                                                                                             |          |
|                              | (d) If applicable, describe analytical methods taking account of sampling strategy | 6                                                                                                                                                                                                 |          |
|                              | (e) Describe any sensitivity analyses                                              | NR                                                                                                                                                                                                |          |
| <b>Results</b>               |                                                                                    |                                                                                                                                                                                                   |          |
| Participants                 | 13*                                                                                | (a) Report numbers of individuals at each stage of study—eg numbers potentially eligible, examined for eligibility, confirmed eligible, included in the study, completing follow-up, and analysed | 8        |

|                          |     |                                                                                                                                                                                                              |                                     |
|--------------------------|-----|--------------------------------------------------------------------------------------------------------------------------------------------------------------------------------------------------------------|-------------------------------------|
|                          |     | (b) Give reasons for non-participation at each stage                                                                                                                                                         | This information was not collected. |
|                          |     | (c) Consider use of a flow diagram                                                                                                                                                                           | -                                   |
| Descriptive data         | 14* | (a) Give characteristics of study participants (eg demographic, clinical, social) and information on exposures and potential confounders                                                                     | 8, 11                               |
|                          |     | (b) Indicate number of participants with missing data for each variable of interest                                                                                                                          | 6                                   |
| Outcome data             | 15* | Report numbers of outcome events or summary measures                                                                                                                                                         | 8                                   |
| Main results             | 16  | (a) Give unadjusted estimates and, if applicable, confounder-adjusted estimates and their precision (eg, 95% confidence interval). Make clear which confounders were adjusted for and why they were included | 12,13,14                            |
|                          |     | (b) Report category boundaries when continuous variables were categorized                                                                                                                                    | 12,13,14                            |
|                          |     | (c) If relevant, consider translating estimates of relative risk into absolute risk for a meaningful time period                                                                                             | NR                                  |
| Other analyses           | 17  | Report other analyses done—eg analyses of subgroups and interactions, and sensitivity analyses                                                                                                               | NR                                  |
| <b>Discussion</b>        |     |                                                                                                                                                                                                              |                                     |
| Key results              | 18  | Summarise key results with reference to study objectives                                                                                                                                                     | 8                                   |
| Limitations              | 19  | Discuss limitations of the study, taking into account sources of potential bias or imprecision. Discuss both direction and magnitude of any potential bias                                                   | 9,10                                |
| Interpretation           | 20  | Give a cautious overall interpretation of results considering objectives, limitations, multiplicity of analyses, results from similar studies, and other relevant evidence                                   | 9,10                                |
| Generalisability         | 21  | Discuss the generalisability (external validity) of the study results                                                                                                                                        | 9,10                                |
| <b>Other information</b> |     |                                                                                                                                                                                                              |                                     |
| Funding                  | 22  | Give the source of funding and the role of the funders for the present study and, if applicable, for the original study on which the present article is based                                                | 10                                  |

\*Give information separately for exposed and unexposed groups.

**Note:** An Explanation and Elaboration article discusses each checklist item and gives methodological background and published examples of transparent reporting. The STROBE checklist is best used in conjunction with this article (freely available on the Web sites of PLoS Medicine at <http://www.plosmedicine.org/>, Annals of Internal Medicine at <http://www.annals.org/>, and Epidemiology at <http://www.epidem.com/>). Information on the STROBE Initiative is available at [www.strobe-statement.org](http://www.strobe-statement.org).

# BMJ Open

## Area deprivation, screen time and consumption of food and drink high in fat salt and sugar (HFSS) in young people: Results from a cross sectional study in the UK

|                                 |                                                                                                                                                                                                                                                                                                                                                                                                                                                                                           |
|---------------------------------|-------------------------------------------------------------------------------------------------------------------------------------------------------------------------------------------------------------------------------------------------------------------------------------------------------------------------------------------------------------------------------------------------------------------------------------------------------------------------------------------|
| Journal:                        | <i>BMJ Open</i>                                                                                                                                                                                                                                                                                                                                                                                                                                                                           |
| Manuscript ID                   | bmjopen-2018-027333.R3                                                                                                                                                                                                                                                                                                                                                                                                                                                                    |
| Article Type:                   | Research                                                                                                                                                                                                                                                                                                                                                                                                                                                                                  |
| Date Submitted by the Author:   | 06-Jun-2019                                                                                                                                                                                                                                                                                                                                                                                                                                                                               |
| Complete List of Authors:       | Thomas, Fiona; Cancer Research UK, Cancer Prevention<br>Thomas, Christopher; Cancer Research UK, Policy Research Centre for Cancer Prevention<br>Hooper, Lucie; Cancer Research UK, Policy Research Centre for Cancer Prevention<br>Rosenberg, Gillian; Cancer Research UK, Policy Research Centre for Cancer Prevention<br>Vohra, Jyotsna; Cancer Research UK, Cancer Prevention<br>Bauld, Linda; University of Edinburgh, Usher Institute of Population Health Sciences and Informatics |
| <b>Primary Subject Heading</b>: | Public health                                                                                                                                                                                                                                                                                                                                                                                                                                                                             |
| Secondary Subject Heading:      | Nutrition and metabolism, Health policy, Public health                                                                                                                                                                                                                                                                                                                                                                                                                                    |
| Keywords:                       | young people, inequalities, consumption, screen time, health knowledge, deprivation                                                                                                                                                                                                                                                                                                                                                                                                       |
|                                 |                                                                                                                                                                                                                                                                                                                                                                                                                                                                                           |

SCHOLARONE™  
Manuscripts

1  
2  
3 **Area deprivation, screen time and consumption of food and drink high in fat salt**  
4 **and sugar (HFSS) in young people: Results from a cross sectional study in the**  
5 **UK**  
6

7  
8 **Fiona Thomas<sup>1</sup>, Christopher Thomas<sup>1</sup>, Lucie Hooper<sup>1</sup>, Gillian Rosenberg<sup>1</sup>, Jyotsna Vohra<sup>1</sup>**  
9 **and Linda Bauld<sup>1,2</sup>**

10 <sup>1</sup>Cancer Policy Research Centre, Cancer Research UK

11 <sup>2</sup>Usher Institute, University of Edinburgh  
12

13 **Key words:** Obesity, Young people, Inequalities, Consumption, Screen time, Health Knowledge,  
14 Deprivation  
15

16 **Correspondence to:** Fiona Thomas, Cancer Research UK, Angel Building, 407 St. John Street  
17 London, EC1V 4AD  
18

19 **Contact Details:**  
20

21 Fiona Thomas – [fiona.thomas@hotmail.com](mailto:fiona.thomas@hotmail.com)

22 Christopher Thomas – [Christopher.Thomas@cancer.org.uk](mailto:Christopher.Thomas@cancer.org.uk)

23 Lucie Hooper – [Lucie.Hooper@cancer.org.uk](mailto:Lucie.Hooper@cancer.org.uk)

24 Gillian Rosenberg – [Gillian.Rosenberg@cancer.org.uk](mailto:Gillian.Rosenberg@cancer.org.uk)

25 Jyotsna Vohra – [Jyotsna.Vohra@cancer.org.uk](mailto:Jyotsna.Vohra@cancer.org.uk)

26 Linda Bauld – [Linda.Bauld@ed.ac.uk](mailto:Linda.Bauld@ed.ac.uk)  
27  
28  
29

30 **Word Count:** 3289

31  
32 **Number of Tables:** 4

33 **Number of References:** 54  
34  
35  
36  
37  
38  
39

40 **Corresponding Author:**  
41

42 Fiona Thomas

43 Cancer Policy Research Centre

44 Cancer Research UK

45 Angel Building

46 407 St. John Street

47 London

48 EC1V 4AD

49 United Kingdom

50 Tel - 020 3469 6357

51 Email - [fiona.thomas@hotmail.com](mailto:fiona.thomas@hotmail.com)  
52  
53  
54  
55  
56  
57  
58  
59  
60

## Abstract

**Objectives:** To investigate associations between deprivation in young people and consumption of foods high in fat, salt and sugar (HFSS), screen time exposure and health knowledge.

**Design:** An online cross-sectional survey with 11-19-year olds in the UK, where participants reported consumption behaviours across 13 HFSS and two non-HFSS groups; screen time for commercial television and streaming services; and knowledge of health conditions and their links to obesity.

**Setting:** United Kingdom

**Participants:** 3,348 young people aged 11-19 across the United Kingdom (UK).

**Main outcome measures:** The study assessed the consumption behaviours, commercial screen time exposure and the health knowledge of 3,348 11-19-year olds. Multivariate binary regression analysis, controlling for age and gender, was performed.

**Results:** Deprivation level was associated with increases in consumption of six of the HFSS products including energy drinks (OR:2.943 /  $P < 0.001$ ) and sugary drinks (OR:1.938,  $P < 0.001$ ), and a reduction in consumption in the two non-HFSS products included in the study; fruit (OR:0.668 /  $P = 0.004$ ) and vegetables (OR:0.306 /  $P < 0.001$ ). Deprivation was associated with high weekly screen time of both television (OR:2.477 /  $P < 0.001$ ) and streaming (OR:1.679 /  $P = 0.001$ ). Health knowledge was also associated with deprivation. There was lower awareness of the association of obesity and cancer (OR:0.697 /  $P = 0.003$ ) type 2 diabetes (OR:0.64 /  $P = 0.004$ ) and heart disease (OR:0.519 /  $P < 0.001$ ) in the most deprived.

**Conclusions:** Young people from the more deprived areas of the UK were more likely to consume a range of HFSS products, report increased exposure to HFSS advertising and have a poorer awareness of health conditions associated with overweight and obesity. The findings suggest that population level measures addressing childhood obesity should account for consumption patterns among different groups of children and young people and the factors that may influence these.

### Strengths and limitations of this study

- The study identified an association between socio-economic deprivation and risk factors that may influence the prevalence of childhood obesity in the UK through a nationally representative sample of young people aged 11-19 across England and each of the devolved nations.
- Data collected for this study was from a single cross-sectional survey, so it is not possible to determine causation between the variables.
- The study could not directly assess exposure to marketing of foods high in fat, salt and sugar (HFSS), although previous research that had explored the relationship between commercial screen time and exposure and found the two to be related, provided us with greater confidence that screen time may be a reliable proxy for marketing exposure under current UK marketing regulations.

## BACKGROUND

In the UK, around 30% of children are overweight or obese<sup>1</sup> the highest rate of childhood obesity in Europe. This overall figure masks considerable disparities by socioeconomic status. Overweight and obesity prevalence for children in the 10% most deprived areas in England, for example, is more than double that of those who live in the least deprived 10%<sup>2</sup>. Longer term, an obese child is around five times more likely to become an obese adult<sup>3</sup>, and there is substantial evidence that obesity in adulthood directly contributes to the development of conditions such as diabetes, coronary heart disease, stroke and 13 different types of cancer<sup>4-8</sup>.

Previous studies have provided diverse explanations for the rise in levels of obesity, ranging from genetics, increased calorie intake, an increase in sedentary behaviour or a combination of factors<sup>9-11</sup>. The calorie intake increase is thought to be the most significant influence accounting for this rise, caused by a range of environmental factors<sup>9,12,13</sup>, including the role of the marketing and promotion of foods that are high in fat, salt and sugar (HFSS), often referred to as 'junk foods'. Marketing of these foods is extensive and delivered through a variety of platforms including television, streaming, price promotions and print media. Studies have identified a substantial expenditure by manufacturers and retailers on the marketing of junk food to children and young adults<sup>14,15</sup>, and identified that industry recognises the potential marketing has for influencing consumption choices<sup>16</sup>. The link between marketing and weight outcomes, as well as increased consumption of HFSS products has been highlighted by a number of previous studies<sup>17-23</sup>. Assessing exposure to HFSS marketing via self-reported recall of viewing advertisements does have limitations. Thus some studies have used commercial screen time as a proxy for TV and online marketing exposure<sup>17,21</sup>, whereby greater screen time indicates increased exposure to HFSS advertising. Prior content analysis of UK television, where young people make up a large proportion of the audience, highlighted the increased likelihood of HFSS marketing exposure<sup>24</sup>, supporting this proxy measure.

Increasingly, there is a need to identify how marketing and promotion affect children in different social groups or those living in more, or less deprived communities. Studies have previously identified an association between socioeconomic status and obesity<sup>25,26</sup>. This association is likely to be caused by a wide variety of factors including the pricing and availability of particular products in a locality<sup>27</sup>, understanding and awareness of dietary factors and weight and social norms<sup>28,29</sup>. However, further research is required to understand the inter-relationship of these factors and also other drivers of consumption including exposure to HFSS advertising. This type of research is important to identify interventions or policy actions that can contribute to addressing overweight and obesity. Halting or reversing current obesity trends is a current priority for public health policies in the UK<sup>30,31</sup>, and globally<sup>32,33</sup>.

Hooper et al<sup>34</sup>, identified that there is a low level of public awareness of the link between overweight and obesity and resulting preventable health conditions, including cancer. Only 25% of the UK adult population are aware of this link and this lack of awareness is more prevalent in less affluent groups. Other studies have also found an association between greater health awareness and increased support for policy change, particularly for alcohol policy<sup>35,36</sup>. Greater health knowledge may therefore affect how young people view the acceptability of HFSS marketing and also consumption choices.

To date, there is limited research on the association between deprivation, HFSS marketing and obesity. Given these gaps, this study aims to investigate whether such a relationship exists and how it might be influenced by particular mediators such as frequency and duration of exposure to marketing and knowledge and understanding of health risks.

## METHODS

### Study design

An online cross-sectional survey was conducted between April and June 2017. The survey was developed following cognitive testing with a small sample of young people (n=100) to ensure age and cultural comprehensibility of the questions, some of which were based on well validated questions used in other surveys<sup>21, 37-40</sup>. This survey was compiled using the pre-validated questions and the advice of senior researchers from the National Cancer Institute, USA and Public Health England and the comprehensive guidance of the Institute for Social Marketing and the University of Stirling who have experience of running the Youth Tobacco Policy Survey. The final survey covered six main themes; exercise levels; food and drink consumption, screen time, recalled marketing exposure, perceptions of marketing and demographic factors.

A total of 3,348 young people, aged 11-19 were recruited by market research company, YouGov, using their in-house panel. YouGov already had data on the children in households of adult in-house panel members. Children over the age of 16 were directly approached and asked if they wished to participate. For those aged under 16, their parents were contacted and asked if their child could participate in the survey. Data collected was weighted by age, gender, ethnicity, region and social grade to be representative of the UK population.

### Measures

#### Deprivation

Level of deprivation was assessed using an area-based measure rather than individual measure of socio-economic status. The Index of Multiple Deprivation (IMD) was coded into five equal quintiles for analysis, ranging from (1) the lowest 20% of deprivation to (5) the highest 20% of respondents. IMD is a measure of the relative deprivation of an area, combining information from seven domains; income deprivation, employment deprivation, education, skills and training deprivation, health deprivation and disability, crime, barriers to housing and services and living environment deprivation<sup>41</sup>.

#### Consumption Behaviours

The survey measured consumption of a range of food and drink products. Participants were asked to report their consumption behaviours from the question 'How often do you usually eat or drink...?' followed by a series of food categories high in fat, salt and sugar including biscuits and cakes, chips, confectionary, crisps, desserts, energy drinks, flavoured yogurts, milk-based drinks, ready meals, sugary drinks, sweetened cereal and take-aways, as well as with healthy items such as fruit and vegetables. These food groups were chosen using previous research on unhealthy products and with reference to the categories included by Public Health England in their sugar reduction programme<sup>42</sup> and the nutrient profiling model, to ascertain nutritional composition of foods. Responses were graded on a Likert scale from more than once a day to never, and then converted to binary variables across two coding groups. The groups identified as 'higher' consumption depending on the total calorific content in each food<sup>17, 21, 42</sup>. The first coding group included sugar sweetened drinks, flavoured yoghurts, confectionary, cakes/biscuits, fruit, vegetables, diet drinks, crisps and desserts where two or more portions a week was considered high consumption<sup>42</sup>. The second coding group included takeaways, ready meals, energy drinks, fried potato products, milk-based drinks and sugar sweetened cereals where one or more portions a week was considered higher consumption<sup>42</sup>. This coding was deduced from a range of approaches including the Public Health England nutrient model, pilot testing and a review of the average calories in each product, recognising the differences between portion

1  
2  
3 sizes of the food categories. The coding was only calculated for participants who gave an answer, and  
4 those who selected 'not sure' were excluded from the final analysis.  
5

#### 6 Screen Time

7  
8 Commercial screen time was a variable created in the data set based on responses related to frequency  
9 and duration of exposure to TV and streaming (on demand) services<sup>21, 43</sup>. Participants listed the hours  
10 spent watching both commercial and non-commercial TV and streaming services. This excluded  
11 screen time from computers being used for homework. Non-commercial screen time (which contains  
12 no paid for marketing in the UK context) was shown to not be significant in previous analysis of the  
13 data<sup>17-19</sup> and was therefore removed. Weekend and week-day viewing was then weighted and turned  
14 into a weekly measure and categorised; low (<3 hours per week), medium (3 – 21 hours per week)  
15 and high (21 hours or more per week)<sup>21</sup>.  
16

#### 17 Health Knowledge

18  
19 Health knowledge was assessed using the question 'Which, if any, of the following health conditions  
20 do you think can result from being overweight? Please tick all that apply.' Options included answers  
21 that were both correct and incorrect to identify the extent of health knowledge. The eight chosen  
22 conditions were; cancer, stroke, heart disease, diabetes type 1, diabetes type 2, migraines, chicken pox  
23 and flu. From this, the results were coded as a binary variable: 0 – unaware; 1 – aware of the links  
24 between certain conditions and being overweight.  
25

#### 26 Age and gender

27  
28 Control variables were selected on theoretical importance from a rapid review of the literature<sup>21, 40, 43-46</sup>  
29 and included gender (coded 0 – Male, 1 – Female) and age (11-19 years).  
30

#### 31 Patient and Public Involvement

32  
33 Prior to the development of the survey qualitative research was carried out by colleagues at the  
34 University of Stirling and National Centre for Social Research. This work consulted young people  
35 through focus groups, on the design and design and content of the questionnaire. Results of these  
36 focus group discussions were published in a Cancer Research UK report "*It's Just There To Trick  
37 You*"<sup>47</sup>. This PPI development work involved discussion of relevant research questions related to food  
38 and beverage consumption, relevant policy issues (i.e. exposure to food marketing, pricing,  
39 availability), use of broadcast media examples and the appropriateness of questions relating to socio-  
40 demographic characteristics. Questions included in the resulting survey were then trialled with young  
41 people using cognitive interviewing techniques as described above. Survey reports are publicly  
42 available on Cancer Policy Research Centre's website.  
43  
44  
45

#### 46 ETHICS

47  
48 Ethical approval was obtained in January 2017 from the General University Ethics Panel (GUEP) at  
49 the University of Stirling. This ethical approval covered both cognitive testing of the questionnaires  
50 and the online surveys. YouGov's staff included lead for ethical and quality assurance, to ensure  
51 adherence to best practice throughout testing and data collection. This included ensuring informed  
52 consent was obtained from participants, links were provided to relevant support organisations should  
53 participants wish to contact them and confidentiality of personal information was assured.  
54  
55

#### 56 ANALYSIS

57  
58 Data were analysed using IBM SPSS Version 23. Multiple multivariate binary regression models  
59 were run on the unweighted data to test for associations between deprivation levels and three key  
60 behaviours of young people; consumption behaviours, screen time use and health knowledge. The

consumption model used the dependent binary variables of food and drink consumption behaviours. Models were run separately for each dependent variable, producing 15 models in total. The screen time model used the dependent variable of categorised reported screen time hours. The health knowledge model used the dependent binary variable of awareness of a health condition and its link to overweight and obesity. This included eight different health conditions, some with identified associations, and some without.

Within each of these models the Index of Multiple Deprivation (IMD) variable was used as an independent variable, with the least deprived quintile as the reference group. Age and gender were included in the models as control variables, as potentially confounding variables.

## RESULTS

### Sample characteristics

Almost half (49%) of the survey respondents were female and 51% male. The mean age of participants was 14.9 years old (SD = 2.55). The majority (82%) were from white British backgrounds with 18% from other ethnic groups. The majority of respondents lived in England (82%); 5% of respondents lived in Wales, 8% in Scotland and 3% in Northern Ireland (*Table 1*).

### Screen time

Of respondents, there were 31.9% in low, 57.1% in medium and 11.0% in high screen time category for television viewing. For streaming services there was 30.3% in low, 50.7% in medium and 19.0% in high screen time categories.

### Deprivation and Consumption Behaviours

The results of the binary logistic regressions showed an association between deprivation and higher consumption behaviours, for a range of HFSS food products (*Table 2*). The most deprived young people were significantly more likely to consume energy drinks (OR= 2.943,  $P < 0.001$ ), followed by sugary drinks (OR= 1.938,  $P < 0.001$ ).

In contrast, analysis identified consumption of fruit and vegetables was inversely associated with more deprived groups. Fruit (OR= 0.668,  $P = 0.004$ ) and vegetables (OR= 0.306,  $P < 0.001$ ) were more likely to be consumed in lower frequency by the most deprived respondents, when compared to the most affluent respondents, as per the use of IMD. Therefore, these young people had a reduced likelihood of consuming the healthier options in higher quantities.

### Deprivation and Screen Time

Regression analysis found an association between deprivation in young people and high weekly screen time of both television and streaming (*Table 3*). The model compared 'high' category screen time (21 hours or more a week) to 'medium and low' screen time (less than 21 hours a week) and found those from the most deprived quintile were significantly more likely to be in the high screen time category than the more affluent respondents, for both television (OR= 2.477,  $P < 0.001$ ) and streaming (OR= 1.679,  $P = 0.001$ ).

### Deprivation and Health Knowledge

The analysis identified an association between deprivation and poorer health knowledge (*Table 4*). Respondents were asked whether eight health conditions (from a pre-existing list) could occur as a result of being overweight or obese. There was significantly poorer awareness of the association between cancer (OR= 0.697,  $P = 0.003$ ), type 2 diabetes (OR= 0.64,  $P = 0.004$ ) and heart disease (OR= 0.519,  $P < 0.001$ ) and obesity for those from the more deprived quintiles. There was also

1  
2  
3 significantly higher association between incorrectly linking type 1 diabetes (OR= 1.536, P < 0.001)  
4 and obesity in the most deprived quintile, compared to the most affluent quintile.  
5  
6  
7  
8  
9  
10  
11  
12  
13  
14  
15  
16  
17  
18  
19  
20  
21  
22  
23  
24  
25  
26  
27  
28  
29  
30  
31  
32  
33  
34  
35  
36  
37  
38  
39  
40  
41  
42  
43  
44  
45  
46  
47  
48  
49  
50  
51  
52  
53  
54  
55  
56  
57  
58  
59  
60

For peer review only

## DISCUSSION

Results from this survey identify a clear association between socio-economic deprivation and risk factors that may influence the prevalence of childhood obesity in the UK. Involving a nationally representative sample of young people aged 11-19 across England and each of the devolved nations, it sought to explore whether young people living in more deprived areas reported knowledge and behaviours that may contribute to obesity. The study found that these young people consumed more foods and beverages high in salt sugar and fat, and were conversely less likely to report consumption of fruit and vegetables. In addition, young people living in more deprived communities spent more time watching commercial broadcast media where they could be exposed to HFSS advertising. Young people living in less affluent areas also had lower levels of awareness of the preventable health conditions, including cancer, which can arise as a result of obesity.

These results support findings from previous studies on factors influencing childhood obesity but also provide new evidence on the clustering of these factors amongst less affluent groups. It is well established that there is a clear gradient in overweight and obesity by socio-economic status in both adults and young people, with individuals from less affluent communities more likely to carry excess weight compared to their more affluent neighbours<sup>2, 25, 26, 48-50</sup>. More limited research has explored how eating patterns vary by deprivation in young people. This study adds to existing evidence suggesting that greater HFSS consumption and lower levels of fruit and vegetable consumption are more common in less affluent young people<sup>18, 51</sup>.

This survey also asked young people about the time they spend watching television and on-demand screening services and calculated 'screen time' using an approach employed in previous studies<sup>17, 21</sup>. While higher levels of screen time are associated with sedentary behaviour, which may contribute to obesity, they may also suggest greater exposure to broadcast media marketing including of HFSS foods. Previous research has found that children who spent more time watching commercial TV and on demand programmes in the UK are exposed to more HFSS food marketing than those with lower levels of screen time<sup>24, 52</sup>. Viewing more HFSS ads on TV and streaming has been associated with higher HFSS consumption, with the difference between a high consumer and a low consumer being at least 520 junk food products a year<sup>17</sup>.

We also found that young people living in more deprived areas had lower levels of awareness of the links between overweight and obesity and relevant health conditions. Awareness is relevant because evidence relating to other preventable risk factors (such as smoking and alcohol) suggest that health knowledge is relevant as a preliminary step towards changing behaviour, but also, importantly, understanding and support for policies and interventions that may address key factors that drive consumption including restrictions on marketing and pricing of unhealthy products<sup>35, 36, 53, 54</sup>.

Taken together our findings suggest that inequalities in rates of obesity in young people in the UK may be linked to knowledge and behaviours driven by key aspects of an obesogenic environment. Action to address childhood obesity needs to take into account differential consumption patterns amongst less affluent young people and the factors that may influence these consumption patterns. The introduction of policies and interventions that aim to address these factors, including better information on the health consequences of obesity, reducing exposure to HFSS marketing and other wider population level measures (such as policies to address the price and content of products) should consider and assess their impact on less affluent groups.

### Strengths and limitations of the study

This study has a number of limitations. Data are from a single cross-sectional survey, so it is not possible to determine causation. The measure of deprivation used was an areas-based measure (IMD) which has limitations, as individual or household deprivation may vary within areas. Young people may have limited knowledge and awareness of different health conditions, for example the distinction

1  
2  
3 between Type 1 and Type II diabetes and therefore responses to the question relating to health  
4 conditions may in part reflect this lack of understanding. Responses to each of the key topics of  
5 interest including food consumption patterns, use of streaming services and TV viewing, and  
6 awareness of health conditions linked to obesity were based on self-report and thus subject to mis-  
7 reporting or recall bias. The study could not directly assess exposure to HFSS marketing, although our  
8 previous research has explored the relationship between commercial screen time and exposure and  
9 found the two to be related<sup>17, 21</sup>, which provides us with greater confidence that screen time may be a  
10 reliable proxy for marketing exposure under current UK marketing regulations. The response rate for  
11 this survey is estimated at 26% for 16-19 year olds and 47% for 11-15 year olds with the parental  
12 consent process. This is in line with what is usually obtained for surveys with young people by  
13 YouGov and is a limitation when sampling from this population demographic. Finally, overweight  
14 and obesity in young people is driven by a wide range of factors beyond those assessed in this study.  
15  
16

### 17 **Conclusions and future research**

18  
19 Taken together our findings suggest that inequalities in rates of obesity in young people in the UK  
20 may be linked to knowledge and behaviours driven by key aspects of an obesogenic environment.  
21 Action to address childhood obesity needs to take into account differential consumption patterns  
22 amongst less affluent young people and the factors that may influence these consumption patterns.  
23 The introduction of policies and interventions that aim to address these factors, including better  
24 information on the health consequences of obesity, reducing exposure to HFSS marketing and other  
25 wider population level measures (such as policies to address the price and content of products) should  
26 consider and assess their impact on less affluent groups.  
27  
28

29 Future research should explore in more detail a larger number of factors, including, for example, the  
30 affordability and availability of HFSS foods, social norms and the influence of social networks in  
31 more deprived communities and how these influence knowledge and behaviour among more deprived  
32 young people. In addition, studies should assess the impact of changes to the policy and regulatory  
33 environment proposed in the UK and other countries to reduce childhood obesity and how these  
34 changes may affect young people living in communities where obesity rates are highest.  
35  
36  
37

### 38 **FUNDING AND ACKNOWLEDGEMENTS**

39  
40 We are grateful to the Cancer Policy Research Centre, Cancer Research UK for funding the study.  
41 The views expressed are those of the researchers and not necessarily those of the funder.  
42

### 43 **CONTRIBUTORSHIP STATEMENT**

44  
45 Fiona Thomas carried out the majority of the analysis for this publication along with Chris Thomas  
46 and Lucie Hooper who also developed the questions for the survey. Gillian Rosenberg contributed to  
47 the preparation of the manuscript and analysis plan. Both Jyotsna Vohra and Linda Bauld contributed  
48 to the study design and concept and the preparation of the manuscript.  
49

### 50 **COMPETING INTERESTS**

51  
52 None  
53

### 54 **DATA SHARING AGREEMENT**

55  
56 Data can be made available on request to the Cancer Policy Research Centre (CRUK). Please contact  
57 CPRC@cancer.org.uk  
58  
59  
60

**Table 1: Sample Demographics of the UK Representative respondents**

|           |                    |       |
|-----------|--------------------|-------|
| Male      | 11 to 12           | 11.0% |
|           | 13 to 15           | 16.0% |
|           | 16 to 17           | 12.0% |
|           | 18 to 19           | 12.0% |
| Female    | 11 to 12           | 10.0% |
|           | 13 to 15           | 16.0% |
|           | 16 to 17           | 11.0% |
|           | 18 to 19           | 12.0% |
| Ethnicity | White              | 82.0% |
|           | BME                | 18.0% |
| IMD       | 1,2                | 20.0% |
|           | 3,4                | 20.0% |
|           | 5,6                | 20.0% |
|           | 7,8                | 20.0% |
|           | 9,10               | 20.0% |
| Region    | North East         | 4.0%  |
|           | North West         | 11.1% |
|           | Yorkshire & Humber | 8.5%  |
|           | East Midlands      | 7.3%  |
|           | West Midlands      | 9.3%  |
|           | East               | 9.3%  |
|           | London             | 12.7% |
|           | South East         | 14.0% |
|           | South West         | 8.2%  |
|           | Wales              | 4.7%  |
|           | Scotland           | 7.8%  |
|           | Northern Ireland   | 3.1%  |

Table 2: Consumption behaviours and deprivation. The bolded values indicate significance from the model.

|                           | Consumption Behaviours |                     |                      |                     |                                    |                      |              |
|---------------------------|------------------------|---------------------|----------------------|---------------------|------------------------------------|----------------------|--------------|
|                           | Descriptive Findings   |                     |                      |                     | Logistic Regression / Significance |                      |              |
|                           | Most Deprived 20%      |                     | Least Deprived 20%   |                     | Most deprived quintile             |                      |              |
|                           | High Consumption (%)   | Low Consumption (%) | High Consumption (%) | Low Consumption (%) | OR:                                | CI (95%)             | P - value    |
| <b>Biscuits and cakes</b> | 58.4%                  | 41.6%               | 63.6%                | 36.4%               | 0.841                              | 0.638 - 1.038        | 0.097        |
| <b>Chips</b>              | 72.1%                  | 27.9%               | 67.5%                | 32.5%               | 1.259                              | 0.974 - 1.627        | 0.079        |
| <b>Confectionary</b>      | 65.3%                  | 34.7%               | 66.3%                | 33.7%               | 0.962                              | 0.751 - 1.232        | 0.759        |
| <b>Crisps</b>             | 62.8%                  | 37.2%               | 58.5%                | 41.5%               | 1.232                              | 0.965 - 1.572        | 0.093        |
| <b>Desserts</b>           | 47.1%                  | 52.9%               | 55.2%                | 44.8%               | <b>0.732</b>                       | <b>0.576 - 0.930</b> | <b>0.011</b> |
| <b>Diet Drinks</b>        | 35.7%                  | 64.3%               | 31.2%                | 68.8%               | 1.233                              | 0.959 - 1.585        | 0.102        |
| <b>Energy drinks</b>      | 15.6%                  | 84.4%               | 7.0%                 | 93.0%               | <b>2.493</b>                       | <b>1.676 - 3.706</b> | <b>0.000</b> |
| <b>Flavoured yogurts</b>  | 28.0%                  | 72.0%               | 27.3%                | 72.7%               | 1.061                              | 0.812 - 1.386        | 0.067        |
| <b>Fruit</b>              | 71.3%                  | 28.7%               | 78.8%                | 21.2%               | <b>0.668</b>                       | <b>0.507 - 0.879</b> | <b>0.004</b> |
| <b>Milk based drinks</b>  | 31.3%                  | 68.7%               | 22.6%                | 77.4%               | <b>1.613</b>                       | <b>1.229 - 2.118</b> | <b>0.001</b> |
| <b>Ready meals</b>        | 64.3%                  | 35.7%               | 56.3%                | 43.7%               | <b>1.416</b>                       | <b>1.111 - 1.712</b> | <b>0.005</b> |
| <b>Sugary drinks</b>      | 41.6%                  | 58.4%               | 27.2%                | 72.8%               | <b>1.938</b>                       | <b>1.506 - 2.494</b> | <b>0.000</b> |
| <b>Sweetened cereals</b>  | 49.6%                  | 50.4%               | 44.8%                | 55.2%               | 1.253                              | 0.986 - 1.593        | 0.066        |
| <b>Take-aways</b>         | 39.1%                  | 60.9%               | 25.1%                | 74.9%               | <b>1.914</b>                       | <b>1.482 - 2.472</b> | <b>0.000</b> |
| <b>Vegetables</b>         | 78.9%                  | 21.1%               | 92.4%                | 7.6%                | <b>0.306</b>                       | <b>0.211 - 0.442</b> | <b>0.000</b> |

**Table 3: Screen-time behaviour and deprivation. The bolded values indicate significance from the model.**

|                               | Screen Time Behaviours |                  |                |                      |                  |                |                                    |                      |              |
|-------------------------------|------------------------|------------------|----------------|----------------------|------------------|----------------|------------------------------------|----------------------|--------------|
|                               | Frequency              |                  |                |                      |                  |                | Logistic Regression / Significance |                      |              |
|                               | Most Deprived (20%)    |                  |                | Least Deprived (20%) |                  |                | Most Deprived Quintile             |                      |              |
|                               | Low Viewing %          | Medium Viewing % | High Viewing % | Low Viewing %        | Medium Viewing % | High Viewing % | OR                                 | CI                   | P-Value      |
| <b>Television Screen Time</b> | 25.7%                  | 55.9%            | 18.4%          | 31.7%                | 60.0%            | 8.3%           | <b>2.477</b>                       | <b>1.697 - 3.614</b> | <b>0.000</b> |
| <b>Streaming Screen Time</b>  | 28.2%                  | 46.8%            | 25.0%          | 33.2%                | 50.3%            | 16.5%          | <b>1.679</b>                       | <b>1.234 - 2.283</b> | <b>0.001</b> |

Table 4: Health knowledge and deprivation. The bolded values indicate significance from the model.

|                             | Overall awareness | Frequency                 |                            | Logistic Regression / Significance |                |
|-----------------------------|-------------------|---------------------------|----------------------------|------------------------------------|----------------|
|                             |                   | Most Deprived Awareness % | Least Deprived Awareness % | OR                                 | P Value        |
| <b>Cancer Link</b>          | 42.0%             | 36.1%                     | 44.4%                      | <b>0.697</b>                       | <b>[0.003]</b> |
| <b>Heart Disease Link</b>   | 87.0%             | 83.5%                     | 90.3%                      | <b>0.519</b>                       | <b>[0.000]</b> |
| <b>Stroke Link</b>          | 60.0%             | 62.1%                     | 59.2%                      | 0.862                              | [0.228]        |
| <b>Diabetes Type 1 Link</b> | 39.0%             | 46.1%                     | 36.3%                      | <b>1.536</b>                       | <b>[0.000]</b> |
| <b>Diabetes Type 2 Link</b> | 82.0%             | 78.7%                     | 84.7%                      | <b>0.64</b>                        | <b>[0.004]</b> |
| <b>Flu Link</b>             | 4.0%              | 4.1%                      | 2.7%                       | 1.544                              | [0.196]        |
| <b>Chicken Pox Link</b>     | 1.0%              | 0.4%                      | 0.7%                       | 0.558                              | [0.502]        |
| <b>Migraine Link</b>        | 14.0%             | 11.0%                     | 11.8%                      | 0.907                              | [0.604]        |

**References:**

1. National Child Measurement Programme (NCMP): Trends in child BMI. Public Health England; 2017.
2. Patterns and Trends in Child Obesity. 2018. <https://www.gov.uk/guidance/phe-data-and-analysis-tools#obesity-diet-and-physical-activity2018>.
3. Simmonds M, Llewellyn A, Owen CG, Woolacott N. Predicting adult obesity from childhood obesity: a systematic review and meta-analysis. *Obes Rev* 2016; **17**(2): 95-107.
4. Parkin DM, Boyd, L. 8. Cancers attributable to overweight and obesity in the UK in 2010. *Br J Journal of Cancer* 2011; **105 Suppl 2**: S34-7.
5. Ades PA, Savage PD. Obesity in coronary heart disease: An unaddressed behavioural risk factor. *Prev Med* 2017; **104**: 117-9
6. Brown KF, Rungay H, Dunlop C, et al. The fraction of cancer attributable to modifiable risk factors in England, Wales, Scotland, Northern Ireland, and the United Kingdom in 2015. *Br J Cancer* 2018; **118**(8): 1130-41.
7. Adult obesity and type 2 diabetes. Public Health England; 2014.
8. World Health Organisation. Global Health Risks-Mortality and burden of disease attributable to selected major risks. *The Lancet* 2015.
9. Bleich S, Cutler D, Murray C, Adams A. Why is the developed world obese? *Annu Rev Public Health* 2008; **29**: 273-95
10. Ebbeling CB, Pawlak DB, Ludwig DS. Childhood obesity: public-health crisis, common sense cure. *Lancet* 2002; **360**(9331): 473-82
11. Reilly JJ. Obesity in childhood and adolescence: evidence based clinical and public health perspectives. *Postgrad Med J* 2006; **82**(969): 429-37
12. Afshin A, Penalvo JL, Del Gobbo L, et al. The prospective impact of food pricing on improving dietary consumption: A systematic review and meta-analysis. *PLoS One* 2017; **12**(3): e0172277.
13. Vandevijvere S, Chow CC, Hall KD, Umali E, Swinburn BA. Increased food energy supply as a major driver of the obesity epidemic: a global analysis. *Bull World Health Organ* 2015; **93**(7): 446-56
14. Obesity Health Alliance. Health costs of obesity soaring as junk food companies pour millions into advertising. 2017
15. Powell L, Harris J, Fox T. Food Marketing Expenditures Aimed at Youth Putting the Numbers in Context. *American Journal of Preventative Medicine* 2014; **45**(4): 453-61.
16. Story M, French S. Food Advertising and Marketing Directed at Children and Adolescents in the US. *Int J Behav Nutr Phys Act* 2004; **1**(1): 3.
17. Thomas C, Hooper L, Petty R, Thomas F, Rosenberg G, Vohra J. 10 Years On: Cancer Research UK, 2018.
18. Thomas C, Hooper L, Petty R, Thomas F, Rosenberg G, Vohra J. Under Pressure: New evidence on young people's broadcast marketing exposure in the UK: Cancer Research UK, 2018.
19. Thomas F, Hooper L, Petty R, Thomas C, Rosenberg G, Vohra J. A Prime Time for Action: New evidence on the link between television and on-demand marketing and obesity: Cancer Research UK, 2018.
20. Boyland EJ, Nolan S, Kelly B, et al. Advertising as a cue to consume: a systematic review and meta-analysis of the effects of acute exposure to unhealthy food and nonalcoholic beverage advertising on intake in children and adults. *Am J Clin Nutr* 2016; **103**(2): 519-33.

21. Scully M, Wakefield M, Niven P, et al. Association between food marketing exposure and adolescents' food choices and eating behaviors. *Appetite* 2012; **58**(1): 1-5
22. Halford JC, Boyland EJ, Hughes G, Oliveira LP, Dovey TM. Beyond-brand effect of television (TV) food advertisements/commercials on caloric intake and food choice of 5-7-year-old children. *Appetite* 2007; **49**(1): 263-7
23. National Child Measurement Programme. Changes in children's body mass index between 2006/07 and 2015/16.: Public Health England, 2017
24. Boyland EJ, Harrold JA, Kirkham TC, Halford JC. The extent of food advertising to children on UK television in 2008. *International Journal of Pediatric Obesity* 2011; **6**(5-6): 455-61.
25. Wang Y. Cross-national comparison of childhood obesity: the epidemic and the relationship between obesity and socioeconomic status. *Int J Epidemiol* 2001; **30**(5): 1129-36.
26. Public Health England. Severe obesity in ten to eleven year olds reaches record high. In: Mills J, editor.: Public Health England; 2018
27. Wilsher, S. H., Harrison, F., Yamoah, F., Fearne, A., & Jones, A. (2016). The relationship between unhealthy food sales, socio-economic deprivation and childhood weight status: results of a cross-sectional study in England. *International Journal of Behavioral Nutrition and Physical Activity*, *13*(1), 21.
28. Sanderson, S. C., Waller, J., Jarvis, M. J., Humphries, S. E., & Wardle, J. (2009). Awareness of lifestyle risk factors for cancer and heart disease among adults in the UK. *Patient education and counseling*, *74*(2), 221-227.
29. Puhl, R., & Suh, Y. (2015). Health consequences of weight stigma: implications for obesity prevention and treatment. *Current obesity reports*, *4*(2), 182-190.
30. A Healthier Future - Scotland's Diet and Healthy Weight Delivery Plan. Edinburgh: Scottish Government, 2018.
31. Department of Health and Social Care: Global Public Health Directorate: Obesity FaN. Childhood Obesity: a plan for action. Chapter 2: HM Government, 2018
32. Swinburn BA. Obesity prevention: the role of policies, laws and regulations. *Aust New Zealand Health Policy* 2008; **5**: 12
33. WHO. World Health Organisation: Obesity and Overweight. 2017.  
<http://www.who.int/en/news-room/fact-sheets/detail/obesity-and-overweight> (accessed 24.07.18 2018).
34. Hooper L, Anderson A, Birch J, et al. Public awareness and healthcare professional advice for obesity as a risk factor for cancer in the UK: a cross-sectional survey. *Journal of Public Health* 2017.
35. Buykx P, Li J, Lovatt M, et al. An Examination of Public Attitudes Towards Alcohol Policy: University of Sheffield and Cancer Research UK, 2016
36. Bates S, Holmes J, Gavens L, et al. Awareness of alcohol as a risk factor for cancer is associated with public support for alcohol policies. *BMC Public Health* 2018; **18**(1): 688
37. Public Health England. National Diet and Nutrition Survey. 2016.  
<https://www.gov.uk/government/collections/national-diet-and-nutrition-survey> (accessed 03.01.18 2018)
38. Marketing IoS. Food Choice Survey: University of Stirling, 2007
39. Alcohol (Minimum Unit) Pricing Act 2012.  
[http://www.legislation.gov.uk/asp/2012/4/pdfs/asp\\_20120004\\_en.pdf](http://www.legislation.gov.uk/asp/2012/4/pdfs/asp_20120004_en.pdf)
40. Morley BC, Scully ML, Niven PH, et al. What factors are associated with excess body weight in Australian secondary school students? *Med J Aust* 2012; **196**(3): 189-92.
41. Department for Communities and Local Government. The English Index of Multiple Deprivation (IMD) - Guidance, 2015

- 1  
2  
3  
4  
5  
6  
7  
8  
9  
10  
11  
12  
13  
14  
15  
16  
17  
18  
19  
20  
21  
22  
23  
24  
25  
26  
27  
28  
29  
30  
31  
32  
33  
34  
35  
36  
37  
38  
39  
40  
41  
42  
43  
44  
45  
46  
47  
48  
49  
50  
51  
52  
53  
54  
55  
56  
57  
58  
59  
60
42. Sugar Reduction: Achieving the 20%: Public Health England, 2017
  43. Dixon HG, Scully ML, Wakefield MA, White VM, Crawford DA. The effects of television advertisements for junk food versus nutritious food on children's food attitudes and preferences. *Soc Sci Med* 2007; **65**(7): 1311-23.
  44. Denny S, Lewycka S, Utter J, et al. The association between socioeconomic deprivation and secondary school students' health: findings from a latent class analysis of a national adolescent health survey. *Int J Equity Health* 2016; **15**(1): 109
  45. Nestle M. Food marketing and childhood obesity--a matter of policy. *N Engl J Med* 2006; **354**(24): 2527-9.
  46. Cooke LJ, Wardle J. Age and gender differences in children's food preferences. *Br J Nutr* 2005; **93**(5): 741-6.
  47. MacGregor, A., Biquelet, A., Lepps, H., Porter, L., Eadie, D., McKell, J., MacKintosh, A A., Thomas, C., Hooper, L and Vohra, J (2016) ““It’s just there to trick you””: A qualitative study of 11-19 year olds perceptions of food and drink marketing.” ScotCen Social Research; NatCen Social Research; Institute for Social Marketing, University of Stirling; and Policy Research Centre for Cancer Prevention, Cancer Research UK.
  48. Stamatakis E, Wardle J, Cole TJ. Childhood obesity and overweight prevalence trends in England: evidence for growing socioeconomic disparities. *Int J Obes (Lond)* 2010; **34**(1): 41-7
  49. McLaren L. Socioeconomic status and obesity. *Epidemiol Rev* 2007; **29**: 29-48
  50. Bann D, Johnson W, Li L, Kuh D, Hardy R. Socioeconomic Inequalities in Body Mass Index across Adulthood: Coordinated Analyses of Individual Participant Data from Three British Birth Cohort Studies Initiated in 1946, 1958 and 1970. *PLoS Med* 2017; **14**(1): e1002214
  51. Crawford B, Byun R, Mitchell E, Thompson S, Jalaludin B, Torvaldsen S. Socioeconomic differences in the cost, availability and quality of healthy food in Sydney. *Aust N Z J Public Health* 2017; **41**(6): 567-71
  52. Campbell D. Children seeing up to 12 adverts for junk food an hour on TV, study finds. 2017. <https://www.theguardian.com/society/2017/nov/28/children-seeing-up-to-12-adverts-for-junk-food-an-hour-on-tv-study-finds> (accessed 23.07.18 2018)
  53. Bryant T. Role of knowledge in public health and health promotion policy change. *Health Promot Int* 2002; **17**(1): 89-98
  54. Raphael D and Bryant T (2006) The state’s role in promoting population health: Public health concerns in Canada, USA, UK and Sweden. *Health Policy*. 78 (1) 39 - 55

STROBE Statement—Checklist of items that should be included in reports of *cross-sectional studies*

|                              | Item No                                                                            | Recommendation                                                                                                                                                                                    | Page No. |
|------------------------------|------------------------------------------------------------------------------------|---------------------------------------------------------------------------------------------------------------------------------------------------------------------------------------------------|----------|
| <b>Title and abstract</b>    | 1                                                                                  | (a) Indicate the study's design with a commonly used term in the title or the abstract                                                                                                            | 1        |
|                              |                                                                                    | (b) Provide in the abstract an informative and balanced summary of what was done and what was found                                                                                               | 2        |
| <b>Introduction</b>          |                                                                                    |                                                                                                                                                                                                   |          |
| Background/rationale         | 2                                                                                  | Explain the scientific background and rationale for the investigation being reported                                                                                                              | 5        |
| Objectives                   | 3                                                                                  | State specific objectives, including any prespecified hypotheses                                                                                                                                  | 5        |
| <b>Methods</b>               |                                                                                    |                                                                                                                                                                                                   |          |
| Study design                 | 4                                                                                  | Present key elements of study design early in the paper                                                                                                                                           | 6        |
| Setting                      | 5                                                                                  | Describe the setting, locations, and relevant dates, including periods of recruitment, exposure, follow-up, and data collection                                                                   | 6        |
| Participants                 | 6                                                                                  | (a) Give the eligibility criteria, and the sources and methods of selection of participants                                                                                                       | 6        |
| Variables                    | 7                                                                                  | Clearly define all outcomes, exposures, predictors, potential confounders, and effect modifiers. Give diagnostic criteria, if applicable                                                          | 6        |
| Data sources/<br>measurement | 8*                                                                                 | For each variable of interest, give sources of data and details of methods of assessment (measurement). Describe comparability of assessment methods if there is more than one group              | 6        |
| Bias                         | 9                                                                                  | Describe any efforts to address potential sources of bias                                                                                                                                         | 6        |
| Study size                   | 10                                                                                 | Explain how the study size was arrived at                                                                                                                                                         | 6        |
| Quantitative variables       | 11                                                                                 | Explain how quantitative variables were handled in the analyses. If applicable, describe which groupings were chosen and why                                                                      | 6, 7     |
| Statistical methods          | 12                                                                                 | (a) Describe all statistical methods, including those used to control for confounding                                                                                                             | 6, 7     |
|                              |                                                                                    | (b) Describe any methods used to examine subgroups and interactions                                                                                                                               | 7        |
|                              | (c) Explain how missing data were addressed                                        | Not recorded for this study as online survey was used                                                                                                                                             |          |
|                              | (d) If applicable, describe analytical methods taking account of sampling strategy | 6                                                                                                                                                                                                 |          |
|                              | (e) Describe any sensitivity analyses                                              | NR                                                                                                                                                                                                |          |
| <b>Results</b>               |                                                                                    |                                                                                                                                                                                                   |          |
| Participants                 | 13*                                                                                | (a) Report numbers of individuals at each stage of study—eg numbers potentially eligible, examined for eligibility, confirmed eligible, included in the study, completing follow-up, and analysed | 8        |

|                          |     |                                                                                                                                                                                                              |                                     |
|--------------------------|-----|--------------------------------------------------------------------------------------------------------------------------------------------------------------------------------------------------------------|-------------------------------------|
|                          |     | (b) Give reasons for non-participation at each stage                                                                                                                                                         | This information was not collected. |
|                          |     | (c) Consider use of a flow diagram                                                                                                                                                                           | -                                   |
| Descriptive data         | 14* | (a) Give characteristics of study participants (eg demographic, clinical, social) and information on exposures and potential confounders                                                                     | 8, 11                               |
|                          |     | (b) Indicate number of participants with missing data for each variable of interest                                                                                                                          | 6                                   |
| Outcome data             | 15* | Report numbers of outcome events or summary measures                                                                                                                                                         | 8                                   |
| Main results             | 16  | (a) Give unadjusted estimates and, if applicable, confounder-adjusted estimates and their precision (eg, 95% confidence interval). Make clear which confounders were adjusted for and why they were included | 12,13,14                            |
|                          |     | (b) Report category boundaries when continuous variables were categorized                                                                                                                                    | 12,13,14                            |
|                          |     | (c) If relevant, consider translating estimates of relative risk into absolute risk for a meaningful time period                                                                                             | NR                                  |
| Other analyses           | 17  | Report other analyses done—eg analyses of subgroups and interactions, and sensitivity analyses                                                                                                               | NR                                  |
| <b>Discussion</b>        |     |                                                                                                                                                                                                              |                                     |
| Key results              | 18  | Summarise key results with reference to study objectives                                                                                                                                                     | 8                                   |
| Limitations              | 19  | Discuss limitations of the study, taking into account sources of potential bias or imprecision. Discuss both direction and magnitude of any potential bias                                                   | 9,10                                |
| Interpretation           | 20  | Give a cautious overall interpretation of results considering objectives, limitations, multiplicity of analyses, results from similar studies, and other relevant evidence                                   | 9,10                                |
| Generalisability         | 21  | Discuss the generalisability (external validity) of the study results                                                                                                                                        | 9,10                                |
| <b>Other information</b> |     |                                                                                                                                                                                                              |                                     |
| Funding                  | 22  | Give the source of funding and the role of the funders for the present study and, if applicable, for the original study on which the present article is based                                                | 10                                  |

\*Give information separately for exposed and unexposed groups.

**Note:** An Explanation and Elaboration article discusses each checklist item and gives methodological background and published examples of transparent reporting. The STROBE checklist is best used in conjunction with this article (freely available on the Web sites of PLoS Medicine at <http://www.plosmedicine.org/>, Annals of Internal Medicine at <http://www.annals.org/>, and Epidemiology at <http://www.epidem.com/>). Information on the STROBE Initiative is available at [www.strobe-statement.org](http://www.strobe-statement.org).
